# Supplementary material
Source: publisher figshare collection journal article supplement (https://plos.figshare.com/articles/dataset/_/7118924)
Supplement: Supplementary file 1 [file 1 › pone.0204301.s001.xls]

## Sheet: Sheet1
Number	ope_date	before0after1JCI	age	agecategory10	sex	ope_number	department	preAT	AIT	prePT	PT	AAT	postAT	postPT	TPT	matched
1010	2015-04-01	0	49	5	2	1	r	0	31	31	222	27	0	27	280	0
2009	2015-04-06	0	44	5	2	3	r	25	33	58	206	13	1	14	278	0
3008	2015-02-09	0	39	4	2	4	r	7	32	39	244	16	4	20	303	0
4015	2015-04-08	0	71	8	1	5	n	5	55	60	131	27	0	27	218	0
5002	2015-12-28	1	5	1	1	9	e	4	33	37	68	13	2	15	120	0
6001	2016-03-11	1	2	1	2	10	e	10	12	22	29	7	7	14	65	0
7001	2016-02-26	1	2	1	1	12	e	3	45	48	78	15	4	19	145	0
8003	2016-04-29	1	12	2	2	12	e	2	36	38	71	13	1	14	123	0
9002	2015-01-05	0	5	1	1	13	e	4	34	38	55	2	9	11	104	0
10001	2016-05-02	1	2	1	1	14	e	4	35	39	25	6	7	13	77	0
12002	2016-06-08	1	5	1	1	16	e	7	32	39	15	17	3	20	74	0
13002	2014-12-26	0	9	1	2	16	e	2	27	29	24	9	4	13	66	0
20001	2015-01-09	0	2	1	1	19	e	3	20	23	25	22	0	22	70	0
24001	2016-04-30	1	3	1	1	24	e	5	21	26	6	21	0	21	53	0
25001	2015-04-04	0	0	1	2	25	e	5	35	40	93	27	8	35	168	0
26001	2015-07-12	0	0	1	1	25	e	12	26	38	78	17	2	19	135	0
28014	2016-05-10	1	69	7	1	27	h	6	38	44	129	16	3	19	192	0
32001	2016-06-08	1	4	1	2	31	e	5	21	26	30	15	3	18	74	0
35013	2016-01-13	1	61	7	2	33	r	4	26	30	187	16	10	26	243	1
36013	2015-01-07	0	60	7	2	33	r	20	28	48	274	50	5	55	377	0
37011	2014-12-24	0	52	6	2	33	r	3	34	37	121	19	0	19	177	0
38010	2015-01-14	0	48	5	2	33	r	2	32	34	217	7	5	12	263	0
40009	2014-12-24	0	41	5	2	33	r	8	32	40	181	10	5	15	236	0
42013	2015-01-21	0	61	7	2	33	r	4	22	26	297	15	3	18	341	1
57011	2015-03-09	0	52	6	2	33	r	4	24	28	226	4	4	8	262	0
58010	2015-02-18	0	48	5	2	33	r	1	43	44	218	16	3	19	281	0
62011	2015-02-05	0	51	6	2	33	r	16	16	32	172	12	4	16	220	0
64012	2015-04-08	0	57	6	2	33	r	5	29	34	338	11	1	12	384	0
67011	2015-04-02	0	52	6	2	33	r	2	32	34	235	17	6	23	292	0
68016	2015-12-03	0	75	8	2	36	k	3	43	46	98	19	0	19	163	0
70010	2015-12-24	1	45	5	1	36	k	7	43	50	89	8	5	13	152	0
73002	2016-03-14	1	7	1	1	37	b	9	19	28	55	35	1	36	119	0
76005	2015-08-19	0	21	3	2	39	b	10	34	44	152	5	13	18	214	0
77015	2015-05-11	0	73	8	2	39	b	3	25	28	97	20	3	23	148	1
78009	2016-05-02	1	44	5	1	39	b	6	36	42	166	35	4	39	247	1
81003	2016-03-28	1	10	2	2	39	b	3	34	37	143	32	1	33	213	1
82012	2016-03-14	1	55	6	2	39	b	6	36	42	179	13	4	17	238	1
83003	2015-07-29	0	10	2	1	39	b	6	29	35	180	28	3	31	246	0
84011	2015-06-22	0	51	6	2	39	b	5	32	37	124	15	5	20	181	1
86013	2015-05-18	0	62	7	2	39	b	5	30	35	108	24	2	26	169	1
87013	2015-08-10	0	61	7	1	39	b	3	36	39	142	5	4	9	190	0
88013	2014-12-22	0	60	7	2	39	b	5	31	36	110	12	4	16	162	0
91004	2015-03-23	0	15	2	2	39	b	9	32	41	151	19	0	19	211	1
93003	2015-03-11	0	11	2	2	39	b	4	54	58	106	14	2	16	180	0
95009	2016-05-09	1	42	5	2	39	b	7	35	42	110	16	6	22	174	1
96010	2015-06-01	0	46	5	1	39	b	6	39	45	132	1	11	12	189	1
98005	2015-03-16	0	23	3	1	39	b	5	34	39	186	12	7	19	244	0
99011	2015-10-21	0	51	6	1	39	b	5	37	42	133	28	6	34	209	0
100005	2015-02-23	0	23	3	1	39	b	0	29	29	161	16	7	23	213	0
101012	2015-03-02	0	57	6	1	39	b	5	39	44	125	14	3	17	186	0
102013	2015-04-06	0	62	7	2	39	b	4	49	53	114	10	1	11	178	0
104014	2016-05-16	1	68	7	2	39	b	10	35	45	219	13	9	22	286	1
105003	2015-12-21	1	10	2	2	39	b	8	37	45	137	14	1	15	197	1
106015	2016-05-16	1	71	8	2	39	b	12	25	37	118	12	11	23	178	1
107002	2016-06-06	1	9	1	1	39	b	4	35	39	171	17	6	23	233	0
108010	2015-01-07	0	46	5	2	39	b	5	20	25	125	13	0	13	163	1
110015	2015-04-13	0	71	8	2	39	b	7	34	41	87	14	8	22	150	0
111002	2015-08-10	0	7	1	2	39	b	8	37	45	139	16	5	21	205	0
113015	2015-09-09	0	73	8	2	39	b	4	29	33	132	12	1	13	178	0
115004	2015-03-16	0	15	2	2	39	b	8	35	43	131	20	0	20	194	1
116014	2015-05-25	0	65	7	1	39	b	3	37	40	152	16	4	20	212	0
117004	2015-08-03	0	15	2	1	39	b	10	31	41	119	21	3	24	184	0
118003	2015-02-02	0	12	2	1	40	e	13	32	45	354	56	10	66	465	0
119002	2015-10-08	0	9	1	1	40	e	17	32	49	210	19	30	49	308	0
121001	2015-08-03	0	0	1	2	42	e	2	90	92	188	21	0	21	301	0
124011	2015-01-28	0	52	6	2	46	5	8	43	51	127	16	4	20	198	0
125012	2015-03-11	0	58	6	2	46	5	7	37	44	128	11	5	16	188	0
126013	2015-03-11	0	64	7	2	46	5	12	35	47	129	3	11	14	190	0
127011	2015-01-28	0	50	6	2	47	5	8	32	40	102	19	0	19	161	0
128010	2015-03-18	0	47	5	2	47	5	2	39	41	97	11	3	14	152	0
130002	2016-03-28	1	7	1	1	49	e	3	51	54	250	13	2	15	319	0
132010	2016-03-16	1	49	5	2	51	5	8	64	72	338	21	0	21	431	0
136001	2016-02-23	1	1	1	1	56	n	0	25	25	19	13	8	21	65	0
137001	2016-03-18	1	1	1	2	56	n	8	29	37	22	13	1	14	73	0
138009	2016-04-16	1	40	5	1	56	n	2	42	44	67	26	6	32	143	0
139002	2016-01-10	1	5	1	2	57	n	5	28	33	47	12	3	15	95	0
140013	2016-02-19	1	62	7	2	58	k	8	17	25	28	15	4	19	72	0
141003	2015-04-13	0	13	2	2	62	e	4	34	38	154	13	0	13	205	0
142009	2015-07-22	0	41	5	2	63	5	5	41	46	203	8	7	15	264	1
143010	2016-05-11	1	45	5	2	63	5	6	32	38	127	7	5	12	177	1
144011	2016-05-18	1	51	6	2	63	5	5	43	48	92	9	4	13	153	1
146007	2015-06-03	0	34	4	2	63	5	3	38	41	95	10	5	15	151	0
147010	2015-10-14	0	49	5	2	63	5	4	34	38	132	14	9	23	193	0
148007	2015-10-21	0	31	4	2	63	5	10	38	48	98	15	5	20	166	0
149009	2016-05-18	1	44	5	2	63	5	5	32	37	100	10	4	14	151	1
150010	2016-05-18	1	45	5	2	63	5	4	37	41	110	13	0	13	164	1
151010	2015-07-15	0	49	5	2	63	5	4	43	47	204	14	5	19	270	0
152010	2015-09-30	0	48	5	2	63	5	4	38	42	138	20	1	21	201	0
153010	2015-05-20	0	49	5	2	63	5	0	39	39	181	15	0	15	235	0
155012	2015-04-15	0	56	6	2	63	5	4	35	39	202	12	11	23	264	0
156011	2015-11-11	0	50	6	2	63	5	4	44	48	185	9	12	21	254	1
157011	2015-11-25	0	50	6	2	63	5	17	34	51	121	12	4	16	188	0
158012	2015-06-17	0	59	6	2	63	5	7	36	43	114	23	1	24	181	0
159010	2015-07-08	0	46	5	2	63	5	11	27	38	83	10	3	13	134	0
160008	2016-05-25	1	37	4	2	63	5	5	36	41	151	14	1	15	207	1
162010	2015-05-20	0	46	5	2	63	5	2	41	43	134	9	3	12	189	0
163010	2015-04-22	0	48	5	2	63	5	8	41	49	132	10	7	17	198	1
164011	2015-02-25	0	53	6	2	63	5	5	55	60	143	17	13	30	233	1
165009	2016-05-25	1	40	5	2	63	5	12	46	58	110	17	3	20	188	1
166011	2015-12-02	0	50	6	2	63	5	6	37	43	85	13	10	23	151	0
167010	2015-07-22	0	48	5	2	63	5	8	39	47	170	16	0	16	233	1
168013	2016-02-03	1	63	7	2	63	5	3	38	41	138	2	18	20	199	1
169009	2016-02-03	1	44	5	2	63	5	12	29	41	94	5	9	14	149	1
170009	2016-02-24	1	41	5	2	63	5	1	30	31	105	6	8	14	150	1
171010	2016-02-10	1	45	5	2	63	5	11	48	59	123	15	2	17	199	1
172011	2016-01-20	1	54	6	2	63	5	3	35	38	121	18	0	18	177	1
173010	2016-03-16	1	46	5	2	63	5	3	36	39	111	16	0	16	166	1
174008	2015-12-09	0	39	4	2	63	5	2	30	32	102	12	8	20	154	0
175009	2015-11-18	0	44	5	2	63	5	7	35	42	161	19	3	22	225	1
176012	2015-06-03	0	59	6	2	63	5	2	36	38	106	8	46	54	198	0
177008	2015-10-07	0	37	4	2	63	5	17	38	55	97	33	4	37	189	0
178011	2015-08-19	0	51	6	2	63	5	9	45	54	111	8	5	13	178	1
179010	2015-02-04	0	45	5	2	63	5	0	38	38	82	8	6	14	134	1
180010	2015-09-30	0	46	5	2	63	5	15	33	48	87	9	7	16	151	0
181013	2015-12-02	0	60	7	2	63	5	16	51	67	166	12	7	19	252	1
182010	2015-07-01	0	49	5	2	63	5	8	48	56	96	16	3	19	171	0
183009	2015-06-10	0	44	5	2	63	5	6	32	38	119	10	2	12	169	1
184009	2015-01-21	0	42	5	2	63	5	3	38	41	132	10	3	13	186	1
185010	2015-03-25	0	47	5	2	63	5	1	35	36	161	25	4	29	226	1
186010	2016-03-23	1	49	5	2	63	5	5	32	37	147	8	5	13	197	1
187009	2016-04-20	1	44	5	2	63	5	2	54	56	72	13	0	13	141	1
188009	2015-08-12	0	42	5	2	63	5	10	34	44	114	7	5	12	170	0
189010	2015-10-07	0	49	5	2	63	5	4	31	35	192	11	5	16	243	1
190010	2015-06-17	0	48	5	2	63	5	13	38	51	146	22	6	28	225	0
191009	2015-12-09	0	42	5	2	63	5	13	37	50	111	6	9	15	176	0
193011	2016-03-25	1	54	6	2	63	5	6	28	34	162	10	13	23	219	1
194010	2016-06-08	1	47	5	2	63	5	11	40	51	99	10	10	20	170	1
195009	2015-10-28	0	40	5	2	63	5	3	38	41	114	10	3	13	168	0
196009	2015-01-21	0	42	5	2	63	5	9	39	48	154	7	16	23	225	1
197009	2015-08-19	0	42	5	2	63	5	7	37	44	122	9	1	10	176	1
198010	2015-06-10	0	45	5	2	63	5	3	31	34	117	24	0	24	175	0
199011	2015-07-08	0	53	6	2	63	5	8	42	50	215	13	3	16	281	1
200010	2015-11-18	0	48	5	2	63	5	2	39	41	84	11	7	18	143	0
201014	2016-02-17	1	68	7	2	63	5	7	54	61	113	22	5	27	201	0
202007	2015-09-09	0	32	4	2	63	5	3	37	40	89	13	4	17	146	0
203010	2015-12-16	1	49	5	2	63	5	7	47	54	151	5	4	9	214	1
204008	2015-11-04	0	35	4	2	63	5	7	35	42	107	15	7	22	171	0
205010	2015-03-25	0	49	5	2	63	5	8	37	45	101	14	7	21	167	1
206011	2015-12-09	0	52	6	2	63	5	7	42	49	77	7	7	14	140	0
207012	2015-11-18	0	58	6	2	63	5	5	31	36	117	11	5	16	169	0
208008	2015-05-13	0	38	4	2	63	5	8	52	60	128	7	10	17	205	1
210009	2015-09-16	0	43	5	2	63	5	2	41	43	93	9	0	9	145	1
211011	2015-02-04	0	50	6	2	63	5	5	37	42	103	16	0	16	161	0
212011	2016-01-13	1	53	6	2	63	5	4	35	39	106	22	1	23	168	1
214010	2016-01-13	1	49	5	2	63	5	4	30	34	111	17	0	17	162	1
215010	2015-05-13	0	47	5	2	63	5	7	37	44	90	16	3	19	153	1
216009	2015-10-21	0	40	5	2	63	5	6	44	50	105	13	7	20	175	0
217011	2015-11-11	0	50	6	2	63	5	3	32	35	126	7	6	13	174	1
218009	2016-01-27	1	42	5	2	63	5	4	47	51	86	13	2	15	152	1
219011	2015-11-11	0	50	6	2	63	5	4	34	38	99	14	7	21	158	0
220011	2016-03-02	1	52	6	2	63	5	7	36	43	93	12	7	19	155	1
221011	2015-07-01	0	51	6	2	63	5	3	36	39	123	20	3	23	185	0
222012	2015-09-16	0	56	6	2	63	5	4	38	42	98	6	3	9	149	0
223010	2015-05-13	0	46	5	2	63	5	2	46	48	130	17	32	49	227	1
224009	2015-06-24	0	43	5	2	63	5	7	33	40	62	18	2	20	122	0
225010	2016-03-09	1	46	5	2	63	5	7	46	53	82	16	6	22	157	1
226001	2015-02-18	0	0	1	1	64	e	6	30	36	31	6	6	12	79	0
227017	2015-05-22	0	80	9	1	65	i	11	36	47	523	18	8	26	596	1
229013	2014-12-18	0	63	7	1	65	i	7	24	31	99	7	2	9	139	0
231012	2015-03-19	0	56	6	1	65	i	12	21	33	112	6	5	11	156	0
232016	2016-04-21	1	75	8	1	65	i	17	28	45	132	15	4	19	196	1
233014	2015-04-10	0	68	7	1	65	i	15	42	57	353	18	4	22	432	0
234017	2016-06-02	1	82	9	1	65	i	13	39	52	114	14	5	19	185	1
235017	2016-03-10	1	82	9	1	65	i	9	31	40	178	17	0	17	235	1
238018	2015-01-06	0	85	9	2	65	i	11	26	37	87	10	0	10	134	1
240017	2015-08-06	0	81	9	1	65	i	7	20	27	188	19	1	20	235	1
245015	2015-04-30	0	74	8	1	65	i	8	35	43	87	15	3	18	148	1
246016	2015-01-29	0	78	8	1	65	i	12	29	41	121	6	5	11	173	1
247017	2016-02-04	1	83	9	2	65	i	6	49	55	118	12	6	18	191	1
248018	2016-05-16	1	85	9	2	65	i	3	39	42	122	28	5	33	197	1
249016	2016-04-07	1	77	8	1	65	i	10	23	33	47	12	1	13	93	1
250015	2015-04-16	0	73	8	1	65	i	5	29	34	131	12	3	15	180	1
251016	2016-04-14	1	78	8	1	65	i	15	29	44	72	22	2	24	140	1
257012	2015-11-05	0	56	6	1	65	i	10	40	50	67	16	4	20	137	1
258017	2016-04-22	1	81	9	1	65	i	11	48	59	306	23	0	23	388	0
259016	2015-03-12	0	76	8	1	65	i	9	40	49	145	24	3	27	221	1
261016	2015-12-17	1	75	8	1	65	i	3	76	79	235	13	13	26	340	1
262016	2016-03-28	1	76	8	1	65	i	20	32	52	182	18	1	19	253	1
263015	2015-12-24	1	71	8	1	65	i	13	39	52	79	26	2	28	159	1
264015	2016-01-21	1	72	8	1	65	i	3	38	41	50	20	0	20	111	0
265016	2015-05-21	0	77	8	1	65	i	5	41	46	61	12	1	13	120	1
267011	2016-02-25	1	54	6	2	65	i	15	49	64	377	19	3	22	463	0
268015	2016-03-31	1	72	8	1	65	i	10	34	44	88	21	2	23	155	0
269017	2015-02-19	0	81	9	2	65	i	25	44	69	377	16	1	17	463	1
272013	2015-02-05	0	64	7	1	65	i	9	40	49	92	12	2	14	155	0
273009	2015-05-21	0	41	5	1	65	i	12	23	35	48	14	2	16	99	0
275012	2016-06-02	1	58	6	1	65	i	10	32	42	60	14	4	18	120	1
276016	2016-05-16	1	78	8	2	65	i	5	30	35	137	10	10	20	192	0
278015	2015-03-19	0	74	8	1	65	i	11	24	35	140	6	4	10	185	1
279014	2016-05-16	1	65	7	2	65	i	5	29	34	105	8	2	10	149	0
280018	2016-02-08	1	88	9	1	66	i	3	31	34	115	18	0	18	167	1
282018	2015-05-25	0	85	9	1	66	i	18	25	43	119	21	3	24	186	1
283016	2015-11-12	0	78	8	1	66	i	15	50	65	100	13	8	21	186	0
284015	2015-08-17	0	72	8	1	67	i	12	21	33	98	8	1	9	140	1
285016	2015-09-14	0	79	8	1	67	i	25	24	49	75	29	19	48	172	0
286017	2015-08-27	0	81	9	1	67	i	10	23	33	106	22	2	24	163	1
287015	2015-07-16	0	74	8	1	67	i	8	44	52	144	17	0	17	213	0
288014	2016-03-07	1	65	7	1	67	i	14	28	42	101	10	0	10	153	1
290017	2015-01-22	0	84	9	1	67	i	10	20	30	152	2	4	6	188	0
292016	2015-02-27	0	75	8	1	67	i	7	23	30	148	10	1	11	189	0
293014	2016-01-14	1	67	7	2	67	i	13	27	40	138	9	3	12	190	1
295018	2015-11-26	0	85	9	1	67	i	12	31	43	93	13	1	14	150	0
296016	2016-04-14	1	79	8	1	67	i	3	38	41	98	12	7	19	158	1
299016	2015-03-19	0	78	8	2	67	i	9	20	29	155	19	2	21	205	0
302012	2015-03-05	0	56	6	1	67	i	0	37	37	68	3	6	9	114	0
304016	2014-12-25	0	77	8	1	67	i	11	25	36	188	6	0	6	230	0
305017	2015-10-02	0	82	9	1	67	i	17	30	47	242	9	30	39	328	0
306015	2016-02-04	1	74	8	1	67	i	4	28	32	82	14	6	20	134	1
307016	2015-06-11	0	78	8	2	67	i	8	26	34	184	5	8	13	231	0
309016	2015-01-08	0	75	8	1	67	i	15	28	43	103	22	5	27	173	1
310016	2015-06-03	0	78	8	2	67	i	5	30	35	298	11	6	17	350	0
311018	2016-05-02	1	88	9	1	67	i	9	26	35	308	11	10	21	364	1
312017	2015-02-26	0	81	9	1	67	i	6	22	28	88	19	0	19	135	0
313017	2015-06-18	0	83	9	1	67	i	21	37	58	119	15	7	22	199	0
318015	2015-09-03	0	73	8	1	67	i	9	27	36	134	10	4	14	184	1
320015	2014-12-18	0	74	8	1	67	i	7	20	27	141	8	1	9	177	0
321016	2016-01-21	1	75	8	1	67	i	5	32	37	79	17	5	22	138	1
322014	2015-02-27	0	68	7	2	67	i	8	21	29	96	7	3	10	135	1
323018	2015-10-15	0	86	9	1	67	i	7	37	44	388	20	10	30	462	0
324016	2015-03-13	0	75	8	2	67	i	5	27	32	144	8	5	13	189	0
325017	2014-12-18	0	83	9	2	67	i	23	44	67	92	0	7	7	166	0
327018	2015-12-03	0	87	9	1	67	i	12	28	40	56	6	5	11	107	1
328015	2015-09-10	0	73	8	1	67	i	7	21	28	110	3	3	6	144	1
329015	2015-02-27	0	70	8	1	67	i	9	28	37	138	10	3	13	188	0
330017	2016-04-18	1	83	9	1	67	i	8	34	42	213	26	3	29	284	1
331013	2015-04-24	0	61	7	1	67	i	11	24	35	104	9	2	11	150	1
335016	2015-10-08	0	78	8	1	67	i	9	25	34	134	10	2	12	180	0
336013	2016-05-18	1	62	7	1	67	i	14	25	39	191	29	0	29	259	1
338015	2015-08-20	0	73	8	1	67	i	3	38	41	104	10	3	13	158	1
339015	2016-04-07	1	70	8	1	67	i	4	22	26	115	5	4	9	150	1
341014	2015-03-02	0	68	7	1	67	i	18	25	43	110	7	2	9	162	0
344016	2016-01-21	1	79	8	1	67	i	5	27	32	76	9	10	19	127	1
345016	2016-03-03	1	75	8	1	67	i	8	38	46	114	4	7	11	171	1
346015	2014-12-26	0	71	8	1	67	i	13	31	44	144	10	5	15	203	1
347016	2015-01-29	0	76	8	1	67	i	11	22	33	201	10	1	11	245	0
348015	2015-11-12	0	74	8	1	67	i	9	36	45	115	10	1	11	171	0
350013	2016-01-06	1	62	7	1	67	i	0	42	42	278	19	0	19	339	1
353016	2015-03-06	0	77	8	2	67	i	7	24	31	142	7	6	13	186	0
354017	2015-03-13	0	83	9	1	67	i	11	21	32	152	6	6	12	196	0
355016	2015-06-18	0	75	8	1	67	i	16	32	48	154	16	2	18	220	0
356014	2015-08-03	0	66	7	1	67	i	10	26	36	132	9	0	9	177	1
357016	2015-02-12	0	77	8	1	67	i	6	20	26	102	19	15	34	162	1
358018	2015-12-24	1	88	9	1	67	i	11	42	53	104	16	1	17	174	1
359017	2015-03-16	0	84	9	2	67	i	12	22	34	106	13	7	20	160	0
360016	2016-04-28	1	78	8	1	67	i	16	34	50	130	11	10	21	201	1
361016	2015-05-21	0	79	8	1	67	i	12	29	41	83	8	3	11	135	0
362014	2015-05-21	0	66	7	1	67	i	11	39	50	164	19	10	29	243	0
364017	2015-10-15	0	81	9	1	67	i	11	30	41	191	3	3	6	238	1
365016	2015-07-13	0	79	8	1	67	i	7	44	51	546	15	15	30	627	0
367015	2016-02-25	1	74	8	1	67	i	9	33	42	105	13	2	15	162	1
368014	2015-09-17	0	69	7	1	67	i	11	40	51	144	9	3	12	207	1
369015	2015-02-12	0	71	8	1	67	i	7	29	36	138	7	1	8	182	1
371018	2015-04-23	0	86	9	1	67	i	6	50	56	101	7	0	7	164	0
372017	2015-10-20	0	81	9	1	67	i	15	32	47	179	15	3	18	244	1
373015	2015-04-27	0	71	8	1	67	i	8	21	29	93	10	2	12	134	0
374017	2015-01-22	0	81	9	1	67	i	6	30	36	134	5	4	9	179	0
377018	2015-12-25	1	86	9	1	67	i	10	38	48	195	12	6	18	261	1
378015	2015-08-17	0	74	8	1	67	i	15	43	58	490	10	27	37	585	1
379016	2016-01-07	1	76	8	1	67	i	9	37	46	82	13	4	17	145	1
382017	2015-07-16	0	84	9	1	67	i	10	29	39	107	8	0	8	154	0
385001	2016-05-18	1	2	1	1	69	e	6	31	37	14	46	1	47	98	0
388001	2015-12-14	1	1	1	1	72	e	6	36	42	189	28	0	28	259	0
389010	2015-06-03	0	47	5	2	74	m	8	38	46	135	12	2	14	195	0
390011	2015-06-03	0	50	6	2	74	m	12	32	44	172	16	7	23	239	0
391018	2015-08-19	0	85	9	2	75	5	9	50	59	70	7	3	10	139	0
393014	2015-01-09	0	67	7	1	77	h	6	37	43	38	14	7	21	102	0
399014	2016-05-19	1	66	7	2	85	k	3	50	53	108	23	0	23	184	0
404016	2016-06-03	1	75	8	2	86	k	5	42	47	45	25	6	31	123	1
405012	2015-07-17	0	58	6	2	86	5	16	48	64	106	13	5	18	188	1
406013	2015-10-14	0	63	7	1	86	5	5	73	78	182	14	2	16	276	1
407017	2015-08-01	0	80	9	2	86	5	11	35	46	124	1	13	14	184	0
408016	2015-06-17	0	77	8	2	86	5	10	106	116	253	12	8	20	389	1
410013	2015-02-06	0	63	7	2	86	5	1	38	39	66	3	19	22	127	0
412018	2015-06-03	0	85	9	1	86	5	30	44	74	98	9	6	15	187	0
413002	2015-10-07	0	6	1	2	86	5	3	38	41	59	21	0	21	121	0
415011	2016-02-10	1	54	6	2	86	5	20	78	98	251	15	0	15	364	1
416015	2016-05-25	1	73	8	2	86	5	37	5	42	47	0	29	29	118	1
417013	2016-03-04	1	61	7	1	86	5	10	39	49	96	18	6	24	169	1
420012	2015-08-21	0	56	6	1	86	5	22	76	98	127	21	3	24	249	1
421013	2015-11-30	0	63	7	1	86	k	3	33	36	53	17	0	17	106	1
422012	2015-07-03	0	58	6	2	86	5	20	41	61	73	22	3	25	159	0
424016	2015-07-04	0	76	8	2	86	5	9	28	37	123	15	4	19	179	1
425011	2015-12-25	1	54	6	1	86	5	10	41	51	95	19	1	20	166	1
427002	2015-04-01	0	9	1	1	86	i	2	24	26	13	5	9	14	53	0
429008	2015-12-29	1	39	4	1	86	k	8	20	28	61	17	0	17	106	0
430015	2016-06-04	1	70	8	1	86	b	7	26	33	144	24	0	24	201	0
431014	2015-04-03	0	67	7	1	86	5	3	29	32	89	7	3	10	131	0
432016	2016-04-08	1	76	8	1	86	5	11	45	56	76	18	0	18	150	0
433013	2016-05-25	1	61	7	1	86	5	3	44	47	85	21	3	24	156	1
436017	2015-05-27	0	80	9	2	87	q	6	28	34	36	10	5	15	85	0
437017	2015-07-15	0	80	9	2	88	5	8	55	63	97	16	2	18	178	0
438007	2016-02-25	1	32	4	1	88	k	3	25	28	40	12	0	12	80	1
439017	2015-11-11	0	80	9	2	88	5	16	74	90	196	18	6	24	310	0
440014	2015-07-03	0	66	7	2	88	5	9	46	55	90	18	0	18	163	1
441009	2015-08-19	0	42	5	2	88	5	5	45	50	205	22	1	23	278	0
442011	2016-02-05	1	54	6	1	88	5	17	59	76	281	21	20	41	398	1
443011	2016-03-01	1	53	6	1	88	l	4	27	31	43	12	5	17	91	1
445016	2016-04-06	1	76	8	1	88	5	3	49	52	154	14	0	14	220	1
446015	2015-07-17	0	71	8	1	88	5	7	43	50	128	13	7	20	198	1
447011	2015-11-25	0	54	6	1	88	5	9	44	53	236	18	5	23	312	1
449015	2016-05-20	1	72	8	2	88	5	6	49	55	110	20	0	20	185	0
450012	2015-07-31	0	58	6	1	88	5	8	50	58	476	45	4	49	583	1
451005	2015-08-04	0	22	3	1	88	k	5	33	38	55	20	1	21	114	0
452016	2016-02-03	1	75	8	1	88	k	7	19	26	46	10	7	17	89	1
453013	2016-02-10	1	63	7	1	88	5	12	45	57	126	14	4	18	201	1
454009	2015-07-24	0	42	5	2	88	5	4	60	64	174	15	2	17	255	0
455015	2015-07-29	0	73	8	1	88	5	6	35	41	180	10	6	16	237	1
456011	2015-10-30	0	54	6	1	88	5	24	53	77	202	19	2	21	300	0
457013	2016-01-29	1	63	7	1	88	5	7	46	53	117	13	2	15	185	1
458014	2016-03-09	1	67	7	2	88	5	10	35	45	194	5	5	10	249	1
459017	2016-02-05	1	82	9	1	88	n	0	47	47	66	20	3	23	136	0
460014	2015-01-28	0	68	7	1	88	5	9	52	61	143	15	6	21	225	1
461015	2016-03-02	1	70	8	1	88	5	2	79	81	258	18	9	27	366	1
462014	2015-07-03	0	65	7	2	88	5	9	46	55	54	18	2	20	129	0
463008	2015-11-04	0	39	4	1	88	5	7	96	103	588	20	20	40	731	1
464015	2015-06-26	0	72	8	1	88	5	22	25	47	80	20	4	24	151	1
465012	2015-07-01	0	58	6	1	88	5	5	47	52	211	7	4	11	274	0
466017	2015-08-28	0	80	9	2	88	5	10	85	95	299	39	1	40	434	0
467014	2015-10-02	0	67	7	1	88	5	11	33	44	84	25	0	25	153	1
469009	2015-06-30	0	42	5	2	90	5	3	40	43	94	16	4	20	157	0
471017	2015-05-27	0	80	9	1	92	h	6	45	51	15	16	4	20	86	0
472007	2015-07-13	0	32	4	2	93	9	7	14	21	18	2	5	7	46	0
473015	2016-03-02	1	70	8	1	93	h	9	27	36	142	36	4	40	218	0
474012	2016-03-17	1	55	6	1	94	h	25	58	83	525	31	3	34	642	0
475010	2015-12-09	0	48	5	2	95	b	6	28	34	132	11	12	23	189	0
476009	2015-11-13	0	44	5	1	95	b	5	37	42	126	15	3	18	186	0
477006	2015-01-28	0	29	3	1	95	b	8	48	56	157	12	1	13	226	0
478006	2016-06-10	1	28	3	2	95	b	6	47	53	185	15	4	19	257	1
479014	2016-02-12	1	67	7	2	95	b	4	29	33	146	17	4	21	200	1
480011	2016-03-30	1	51	6	2	95	b	12	38	50	152	12	2	14	216	0
481008	2014-12-24	0	38	4	2	95	b	7	31	38	139	18	5	23	200	0
482009	2015-11-11	0	40	5	2	95	b	3	35	38	163	16	6	22	223	1
483009	2015-12-16	1	42	5	2	95	b	6	35	41	104	7	8	15	160	1
484006	2015-07-10	0	28	3	2	95	b	9	25	34	154	7	4	11	199	1
485013	2015-07-15	0	61	7	2	95	b	4	35	39	203	11	12	23	265	1
486007	2015-09-16	0	31	4	2	95	b	7	28	35	94	17	3	20	149	0
487006	2014-12-12	0	28	3	2	95	b	5	25	30	127	14	9	23	180	0
488011	2014-12-19	0	52	6	1	95	b	5	26	31	190	16	0	16	237	0
489009	2015-10-09	0	43	5	1	95	b	5	35	40	137	21	2	23	200	0
492013	2016-04-08	1	63	7	1	97	b	13	41	54	106	23	5	28	188	0
493008	2015-05-22	0	36	4	2	97	b	3	32	35	153	20	6	26	214	0
495008	2015-06-17	0	37	4	2	97	b	2	65	67	248	33	3	36	351	0
499014	2016-04-14	1	68	7	2	97	b	16	34	50	145	20	2	22	217	0
500010	2015-08-27	0	47	5	1	98	i	10	33	43	188	9	0	9	240	0
501009	2014-12-12	0	40	5	2	99	r	2	41	43	35	16	4	20	98	0
502007	2015-12-16	1	30	4	2	100	9	13	41	54	38	1	8	9	101	0
503003	2015-04-27	0	12	2	1	101	e	10	38	48	49	21	3	24	121	0
504004	2015-09-18	0	17	2	1	101	e	5	30	35	45	16	3	19	99	0
505004	2016-02-15	1	15	2	2	102	e	20	23	43	42	22	2	24	109	0
507004	2015-08-24	0	19	2	1	104	e	4	40	44	87	49	0	49	180	0
509001	2016-04-29	1	1	1	1	107	e	0	25	25	3	13	2	15	43	0
510001	2014-12-15	0	0	1	2	107	e	8	45	53	23	17	2	19	95	0
512001	2015-02-04	0	0	1	2	108	i	3	71	74	272	10	0	10	356	1
513001	2016-03-02	1	0	1	2	108	i	0	60	60	222	9	3	12	294	1
514001	2015-09-30	0	1	1	1	108	i	2	74	76	227	14	0	14	317	0
515001	2015-07-15	0	0	1	2	108	i	5	89	94	259	16	0	16	369	1
516001	2015-04-08	0	0	1	1	108	i	12	78	90	264	10	0	10	364	0
517001	2015-07-22	0	1	1	1	108	i	6	70	76	246	16	2	18	340	0
518001	2016-05-18	1	1	1	2	108	i	7	94	101	304	10	22	32	437	1
519001	2015-03-18	0	0	1	1	108	i	4	95	99	233	13	1	14	346	1
521001	2015-11-25	0	1	1	1	108	i	6	66	72	268	12	2	14	354	1
523001	2016-02-24	1	0	1	1	108	i	4	59	63	301	8	8	16	380	1
524001	2016-04-27	1	0	1	2	108	i	3	51	54	226	6	0	6	286	0
525001	2016-01-06	1	1	1	1	108	i	5	58	63	323	19	5	24	410	1
526001	2015-03-11	0	1	1	2	109	i	1	60	61	331	14	6	20	412	0
527003	2015-07-06	0	11	2	2	110	e	8	24	32	69	16	0	16	117	0
528008	2015-12-11	0	39	4	1	111	5	30	55	85	337	32	52	84	506	0
529002	2015-09-09	0	5	1	1	113	e	6	26	32	37	16	7	23	92	0
531004	2014-12-17	0	17	2	1	115	e	5	26	31	86	18	10	28	145	0
535002	2016-04-11	1	5	1	1	117	i	3	46	49	22	17	2	19	90	0
536003	2015-08-24	0	12	2	2	117	i	17	53	70	25	21	3	24	119	0
540001	2015-09-02	0	1	1	1	119	i	2	59	61	129	14	12	26	216	0
542001	2015-12-09	0	0	1	2	119	i	9	55	64	88	20	1	21	173	0
545001	2015-03-11	0	0	1	1	119	i	10	27	37	76	17	1	18	131	0
546002	2015-08-21	0	5	1	2	125	e	2	11	13	4	16	1	17	34	0
547005	2016-04-13	1	21	3	2	125	5	12	20	32	61	12	3	15	108	0
548001	2015-04-24	0	0	1	2	125	e	4	12	16	5	11	5	16	37	0
549001	2015-04-22	0	2	1	2	125	e	3	40	43	20	13	4	17	80	0
550001	2015-02-23	0	1	1	1	127	e	6	33	39	42	7	7	14	95	0
551002	2016-05-12	1	6	1	1	128	e	5	25	30	111	20	5	25	166	0
553014	2016-04-20	1	68	7	2	130	q	5	31	36	99	24	3	27	162	0
554011	2015-01-30	0	52	6	2	130	5	4	42	46	71	16	28	44	161	0
556001	2015-04-13	0	2	1	2	131	e	10	30	40	37	13	1	14	91	0
557014	2016-02-09	1	66	7	1	131	2	24	51	75	268	17	5	22	365	0
558016	2015-03-06	0	77	8	1	132	b	5	25	30	63	12	2	14	107	0
559017	2016-03-04	1	81	9	2	132	b	5	28	33	38	13	0	13	84	0
560009	2014-12-26	0	41	5	2	132	b	5	14	19	53	9	0	9	81	0
562003	2016-04-20	1	13	2	2	134	e	7	42	49	57	14	2	16	122	0
563012	2016-03-11	1	59	6	2	135	r	3	17	20	154	20	6	26	200	0
566014	2015-08-18	0	67	7	1	135	p	19	38	57	216	4	9	13	286	0
568006	2015-12-10	0	29	3	2	136	m	13	37	50	144	6	10	16	210	0
569010	2015-04-22	0	46	5	2	136	m	0	34	34	113	9	5	14	161	1
571009	2016-05-09	1	40	5	2	136	m	4	25	29	107	14	1	15	151	1
572013	2015-02-18	0	64	7	2	136	m	2	23	25	90	3	12	15	130	0
573010	2015-04-08	0	49	5	2	136	m	3	29	32	135	9	1	10	177	0
574014	2015-10-13	0	69	7	1	138	h	10	40	50	77	14	8	22	149	0
575001	2015-02-16	0	0	1	2	138	e	0	86	86	363	32	1	33	482	0
578013	2016-01-27	1	64	7	1	139	5	6	44	50	378	20	12	32	460	0
579011	2015-11-20	0	53	6	1	139	h	10	43	53	202	26	3	29	284	0
580011	2015-05-21	0	53	6	1	139	h	5	58	63	67	17	6	23	153	0
583016	2015-10-01	0	78	8	1	141	l	9	26	35	59	20	4	24	118	0
584016	2015-07-23	0	78	8	1	141	l	3	31	34	87	5	4	9	130	0
585015	2016-06-01	1	73	8	2	141	q	8	21	29	95	25	6	31	155	0
586005	2015-10-21	0	20	3	1	144	5	4	62	66	202	33	2	35	303	0
588001	2015-05-01	0	1	1	1	146	5	6	33	39	73	18	0	18	130	0
593001	2015-05-08	0	1	1	2	148	5	4	18	22	14	17	8	25	61	0
595001	2015-05-01	0	0	1	2	148	5	4	27	31	18	27	0	27	76	0
602003	2016-02-24	1	13	2	1	150	e	6	29	35	81	12	1	13	129	0
603003	2016-03-07	1	13	2	1	150	e	6	47	53	103	12	4	16	172	0
604015	2016-03-25	1	72	8	1	151	l	19	60	79	365	73	5	78	522	0
607015	2016-01-26	1	71	8	1	152	p	5	37	42	95	16	2	18	155	1
608014	2015-09-15	0	67	7	1	152	p	14	40	54	154	15	5	20	228	0
609012	2015-11-05	0	58	6	1	152	p	9	46	55	119	10	7	17	191	1
610016	2015-04-28	0	77	8	1	152	p	4	42	46	135	11	4	15	196	1
611013	2015-04-21	0	64	7	1	152	p	4	51	55	177	15	7	22	254	1
613014	2016-03-10	1	69	7	1	152	p	6	43	49	145	25	5	30	224	1
614014	2015-11-17	0	68	7	1	152	p	8	55	63	177	15	16	31	271	1
616014	2015-11-24	0	68	7	1	152	p	10	41	51	195	12	8	20	266	0
617015	2015-09-03	0	70	8	1	152	p	8	38	46	104	21	6	27	177	1
618015	2015-11-17	0	70	8	1	152	p	7	52	59	170	14	4	18	247	0
620017	2016-05-19	1	80	9	1	152	p	5	29	34	144	20	1	21	199	1
622015	2015-12-22	1	74	8	1	152	p	8	43	51	173	11	7	18	242	1
623016	2015-10-13	0	77	8	1	152	p	7	50	57	204	16	3	19	280	1
625012	2016-01-12	1	59	6	1	152	p	3	46	49	132	15	4	19	200	1
627015	2016-02-09	1	70	8	1	152	p	4	33	37	147	16	5	21	205	1
628015	2016-01-14	1	74	8	1	152	p	8	47	55	215	11	6	17	287	1
629015	2016-04-12	1	74	8	1	152	p	7	45	52	193	13	3	16	261	1
630014	2016-04-28	1	69	7	1	152	p	3	31	34	119	13	4	17	170	1
631015	2016-01-07	1	71	8	1	152	p	13	55	68	159	31	4	35	262	1
632014	2015-08-20	0	68	7	1	152	p	8	40	48	158	15	3	18	224	0
633013	2015-09-24	0	63	7	1	152	p	8	43	51	302	6	5	11	364	0
634015	2015-04-09	0	72	8	1	152	p	5	38	43	184	26	1	27	254	1
635012	2015-02-03	0	59	6	1	152	p	7	49	56	261	13	2	15	332	1
638013	2016-06-02	1	60	7	1	152	p	4	54	58	194	14	5	19	271	1
640014	2015-10-27	0	67	7	1	152	p	6	50	56	146	29	1	30	232	1
641016	2015-03-17	0	77	8	1	152	p	4	38	42	178	25	16	41	261	1
643015	2015-07-14	0	74	8	1	152	p	8	46	54	132	19	2	21	207	1
645013	2015-08-04	0	62	7	1	152	p	12	44	56	232	13	10	23	311	1
646013	2016-05-19	1	63	7	1	152	p	9	46	55	115	13	10	23	193	1
648014	2016-03-29	1	69	7	1	152	p	10	42	52	130	15	3	18	200	1
649012	2015-12-15	1	59	6	1	152	p	11	42	53	193	10	13	23	269	1
650014	2015-12-24	1	69	7	1	152	p	4	48	52	187	10	10	20	259	1
651014	2015-02-05	0	69	7	1	152	p	1	47	48	167	22	12	34	249	1
652016	2015-05-26	0	78	8	1	152	p	1	42	43	177	7	5	12	232	1
653013	2015-07-09	0	63	7	1	152	p	6	35	41	209	18	15	33	283	1
655013	2015-10-29	0	64	7	1	152	p	3	51	54	138	16	4	20	212	0
656015	2015-01-22	0	70	8	1	152	p	6	43	49	151	1	19	20	220	1
659016	2016-01-28	1	78	8	1	152	p	4	40	44	93	26	6	32	169	1
660016	2016-03-17	1	75	8	1	152	p	11	57	68	198	22	6	28	294	1
661014	2015-07-28	0	69	7	1	152	p	8	43	51	138	12	7	19	208	1
663013	2016-03-01	1	63	7	1	152	p	4	39	43	119	21	1	22	184	1
664013	2016-02-16	1	62	7	1	152	p	12	31	43	170	6	9	15	228	1
665013	2016-05-17	1	60	7	1	152	p	10	42	52	242	22	4	26	320	1
667016	2016-06-02	1	75	8	1	152	p	1	27	28	145	17	5	22	195	1
668013	2015-09-15	0	62	7	1	152	p	2	46	48	154	20	7	27	229	1
669013	2015-06-23	0	64	7	1	152	p	12	34	46	112	13	12	25	183	0
670014	2015-08-11	0	65	7	1	152	p	5	35	40	109	11	11	22	171	0
672016	2015-11-05	0	75	8	1	152	p	3	40	43	110	23	3	26	179	1
673013	2016-01-26	1	61	7	1	152	p	9	35	44	182	13	3	16	242	1
674013	2016-05-31	1	64	7	1	152	p	7	42	49	280	35	7	42	371	1
675014	2015-08-11	0	65	7	1	152	p	11	51	62	133	8	13	21	216	1
676015	2016-03-01	1	73	8	1	152	p	5	41	46	155	26	2	28	229	1
677013	2015-10-15	0	63	7	1	152	p	11	50	61	169	26	6	32	262	1
678015	2016-05-24	1	70	8	1	152	p	6	44	50	181	25	5	30	261	1
680016	2015-09-29	0	79	8	1	152	p	9	50	59	152	19	3	22	233	1
682015	2015-04-02	0	73	8	1	152	p	5	38	43	263	19	1	20	326	1
684016	2016-02-25	1	75	8	1	152	p	16	36	52	169	24	1	25	246	1
685015	2015-02-12	0	72	8	1	152	p	18	52	70	191	25	10	35	296	1
688015	2015-04-14	0	70	8	1	152	p	9	52	61	264	31	5	36	361	1
689013	2015-06-04	0	63	7	1	152	p	5	37	42	158	13	13	26	226	0
690015	2015-09-17	0	72	8	1	152	p	5	42	47	152	20	8	28	227	1
691013	2015-10-20	0	63	7	1	152	p	2	40	42	152	3	19	22	216	1
693013	2015-07-02	0	60	7	1	152	p	8	39	47	176	10	6	16	239	1
695013	2015-08-25	0	62	7	1	152	p	14	40	54	186	6	10	16	256	0
696016	2015-01-15	0	79	8	1	152	p	2	54	56	266	9	4	13	335	1
697014	2016-01-12	1	66	7	1	152	p	9	31	40	174	19	7	26	240	1
698015	2016-03-29	1	71	8	1	152	p	9	36	45	133	16	2	18	196	1
699014	2015-06-11	0	67	7	1	152	p	7	42	49	154	18	3	21	224	1
700013	2015-12-15	1	62	7	1	152	p	9	37	46	143	12	6	18	207	1
701015	2015-03-31	0	73	8	1	152	p	3	39	42	214	18	10	28	284	1
703013	2015-05-07	0	61	7	1	152	p	9	38	47	233	23	7	30	310	0
704015	2015-01-06	0	71	8	1	152	p	8	52	60	191	28	0	28	279	1
706014	2016-04-05	1	69	7	1	152	p	4	40	44	249	10	6	16	309	1
708014	2015-07-09	0	68	7	1	152	p	13	48	61	163	16	5	21	245	0
709015	2016-04-19	1	72	8	1	152	p	6	41	47	177	8	9	17	241	1
711016	2016-05-10	1	75	8	1	152	p	8	37	45	110	17	5	22	177	1
712015	2016-03-15	1	72	8	1	152	p	6	32	38	187	18	2	20	245	1
713011	2015-02-24	0	54	6	1	152	p	1	51	52	241	15	9	24	317	1
714014	2015-08-13	0	65	7	1	152	p	6	41	47	140	16	2	18	205	1
716012	2016-03-15	1	56	6	1	152	p	6	47	53	156	17	6	23	232	1
718014	2015-09-24	0	66	7	1	152	p	6	49	55	174	11	8	19	248	0
719014	2015-09-17	0	65	7	1	152	p	6	60	66	177	12	10	22	265	1
721013	2015-10-06	0	64	7	1	152	p	8	34	42	173	13	8	21	236	0
724016	2015-06-02	0	75	8	1	152	p	0	50	50	174	11	3	14	238	1
725011	2015-02-17	0	51	6	1	152	p	9	40	49	219	3	14	17	285	1
727014	2015-03-24	0	65	7	1	152	p	6	41	47	256	11	0	11	314	0
728012	2016-05-24	1	56	6	1	152	p	6	36	42	137	17	4	21	200	1
729015	2015-10-06	0	70	8	1	152	p	3	28	31	327	25	1	26	384	1
731016	2015-04-21	0	76	8	1	152	p	6	45	51	175	23	3	26	252	1
732015	2015-06-11	0	72	8	1	152	p	5	44	49	123	17	7	24	196	1
733013	2015-10-08	0	63	7	1	152	p	3	44	47	179	26	0	26	252	1
734014	2015-06-16	0	65	7	1	152	p	6	53	59	202	10	0	10	271	1
735015	2015-06-16	0	72	8	1	152	p	3	51	54	213	25	5	30	297	1
736015	2015-03-03	0	74	8	1	152	p	16	71	87	545	17	17	34	666	1
737015	2014-12-25	0	74	8	1	152	p	3	29	32	162	16	6	22	216	1
738015	2016-01-28	1	72	8	1	152	p	5	44	49	249	20	11	31	329	1
745016	2016-02-04	1	75	8	1	152	p	14	52	66	281	32	6	38	385	1
746015	2016-04-05	1	74	8	1	152	p	2	41	43	197	11	1	12	252	1
747013	2016-03-10	1	63	7	1	152	p	10	35	45	136	18	10	28	209	1
748013	2015-06-04	0	64	7	1	152	p	8	48	56	193	14	7	21	270	1
751012	2016-02-09	1	58	6	1	152	p	0	52	52	213	8	6	14	279	1
752012	2016-02-23	1	57	6	1	152	p	13	45	58	166	13	10	23	247	1
753013	2016-03-26	1	63	7	1	152	p	3	32	35	88	15	5	20	143	1
754015	2016-03-24	1	72	8	1	152	p	2	49	51	282	5	10	15	348	1
755012	2015-07-07	0	59	6	1	152	p	14	41	55	264	8	5	13	332	1
756014	2015-05-21	0	68	7	1	152	p	8	42	50	157	18	6	24	231	1
758013	2015-02-10	0	63	7	1	152	p	4	45	49	304	22	0	22	375	1
759014	2016-01-19	1	68	7	1	152	p	12	31	43	166	15	6	21	230	1
760014	2015-06-09	0	65	7	1	152	p	8	50	58	206	13	7	20	284	1
761015	2015-06-30	0	71	8	1	152	p	7	40	47	194	16	4	20	261	1
762011	2015-12-10	0	52	6	1	152	p	6	38	44	163	12	9	21	228	0
763014	2015-11-26	0	67	7	1	152	p	8	41	49	150	26	5	31	230	1
764017	2015-04-02	0	80	9	1	152	p	3	32	35	270	19	3	22	327	1
765014	2015-11-19	0	68	7	1	152	p	0	41	41	171	10	6	16	228	0
767013	2015-01-08	0	60	7	1	152	p	8	42	50	168	27	3	30	248	1
769014	2015-07-30	0	66	7	1	152	p	9	42	51	191	11	5	16	258	1
770013	2016-05-12	1	64	7	1	152	p	5	50	55	221	12	6	18	294	1
771016	2016-01-14	1	76	8	1	152	p	10	47	57	155	15	3	18	230	1
772013	2016-03-17	1	62	7	1	152	p	6	42	48	92	18	5	23	163	1
773015	2015-11-12	0	74	8	1	152	p	13	46	59	210	21	10	31	300	1
774014	2015-06-23	0	66	7	1	152	p	3	51	54	136	8	15	23	213	1
776013	2016-04-26	1	64	7	1	152	p	2	47	49	184	15	0	15	248	1
778012	2016-05-31	1	55	6	1	152	p	8	51	59	106	16	11	27	192	1
779015	2016-04-21	1	70	8	1	152	p	6	39	45	161	15	5	20	226	1
780014	2015-03-05	0	65	7	1	152	p	1	39	40	181	24	4	28	249	0
781012	2015-05-14	0	57	6	1	152	p	8	42	50	171	13	2	15	236	0
782013	2015-05-12	0	63	7	1	152	p	5	45	50	226	9	12	21	297	1
783011	2015-02-24	0	54	6	1	152	p	4	40	44	390	25	4	29	463	0
784014	2015-07-02	0	67	7	1	152	p	8	50	58	213	4	7	11	282	1
785014	2016-04-14	1	68	7	1	152	p	1	39	40	100	7	8	15	155	1
788014	2016-02-02	1	67	7	1	152	p	10	43	53	188	23	4	27	268	1
789013	2014-12-18	0	62	7	1	152	p	6	53	59	261	9	7	16	336	0
791015	2015-09-10	0	74	8	1	152	p	7	52	59	183	14	3	17	259	0
792013	2015-04-30	0	63	7	1	152	p	7	41	48	159	16	0	16	223	0
794013	2016-03-22	1	60	7	1	152	p	9	42	51	178	17	3	20	249	1
795015	2015-12-22	1	70	8	1	152	p	5	51	56	143	10	12	22	221	1
796015	2015-09-10	0	71	8	1	152	p	1	44	45	152	13	6	19	216	1
798015	2015-09-29	0	72	8	1	152	p	7	43	50	187	14	7	21	258	1
799014	2015-04-23	0	67	7	1	152	p	3	35	38	198	22	4	26	262	1
800014	2015-04-14	0	69	7	1	152	p	2	38	40	167	15	3	18	225	0
801015	2015-02-26	0	73	8	1	152	p	8	54	62	163	31	10	41	266	1
802016	2016-03-31	1	78	8	1	152	p	5	41	46	135	43	6	49	230	1
803016	2015-07-14	0	77	8	1	152	p	11	34	45	262	20	0	20	327	0
804014	2015-09-01	0	68	7	1	152	p	12	48	60	154	13	7	20	234	1
805015	2015-10-20	0	70	8	1	152	p	8	34	42	186	17	5	22	250	1
806014	2015-02-19	0	69	7	1	152	p	7	41	48	271	10	0	10	329	1
807014	2015-04-30	0	69	7	1	152	p	4	47	51	213	18	2	20	284	0
809013	2015-01-08	0	64	7	1	152	p	4	38	42	185	20	3	23	250	0
810014	2015-03-19	0	67	7	1	152	p	10	47	57	236	11	4	15	308	1
811012	2015-03-10	0	56	6	1	152	p	9	38	47	176	14	1	15	238	0
812014	2016-04-07	1	67	7	1	152	p	1	50	51	133	12	7	19	203	1
813013	2015-10-15	0	62	7	1	152	p	0	43	43	177	12	14	26	246	0
814014	2015-12-17	1	66	7	1	152	p	3	39	42	111	10	7	17	170	1
815014	2015-08-13	0	68	7	1	152	p	7	48	55	228	16	5	21	304	1
816014	2016-05-10	1	66	7	1	152	p	4	35	39	106	13	3	16	161	1
817014	2016-01-21	1	66	7	1	152	p	13	45	58	158	21	5	26	242	1
819015	2015-06-18	0	72	8	1	152	p	9	43	52	168	14	6	20	240	0
820014	2015-01-29	0	69	7	1	152	p	6	43	49	183	17	8	25	257	1
821016	2015-11-10	0	75	8	1	152	p	9	46	55	212	52	0	52	319	1
822012	2015-04-16	0	55	6	1	152	p	5	42	47	238	23	3	26	311	0
824012	2016-05-19	1	56	6	1	152	p	10	45	55	267	22	3	25	347	1
825016	2016-02-16	1	79	8	1	152	p	6	41	47	191	17	11	28	266	1
827016	2015-05-07	0	77	8	1	152	p	0	52	52	125	18	1	19	196	1
828016	2016-02-23	1	76	8	1	152	p	8	41	49	158	25	6	31	238	1
829013	2016-01-21	1	62	7	1	152	p	10	44	54	146	11	10	21	221	1
831015	2016-03-31	1	72	8	1	152	p	8	48	56	196	22	0	22	274	1
832015	2015-08-20	0	73	8	1	152	p	5	35	40	131	16	3	19	190	0
835015	2015-08-18	0	70	8	1	152	p	20	29	49	177	21	5	26	252	1
836015	2016-03-03	1	71	8	1	152	p	6	32	38	93	13	8	21	152	1
837013	2016-04-12	1	62	7	1	152	p	5	34	39	148	15	3	18	205	1
840015	2015-07-21	0	71	8	1	152	p	6	65	71	281	29	13	42	394	1
841014	2016-03-22	1	67	7	1	152	p	5	46	51	202	14	6	20	273	1
842016	2016-05-24	1	76	8	1	152	p	3	34	37	165	13	3	16	218	1
844014	2016-02-18	1	66	7	1	152	p	6	42	48	198	19	5	24	270	1
846013	2016-04-21	1	64	7	1	152	p	8	33	41	136	25	0	25	202	1
847016	2015-06-18	0	75	8	1	152	p	6	48	54	140	22	5	27	221	1
848015	2015-04-28	0	72	8	1	152	p	12	49	61	160	16	9	25	246	0
849013	2015-09-03	0	64	7	1	152	p	4	43	47	183	17	2	19	249	0
852015	2016-03-24	1	72	8	1	152	p	29	40	69	127	15	5	20	216	1
853014	2015-06-25	0	69	7	1	152	p	4	41	45	127	9	7	16	188	0
855015	2015-12-10	0	72	8	1	152	p	14	49	63	105	23	3	26	194	1
856015	2015-07-28	0	71	8	1	152	p	13	41	54	190	11	11	22	266	1
857015	2015-07-16	0	71	8	1	152	p	10	58	68	192	10	5	15	275	0
858015	2015-07-07	0	72	8	1	152	p	6	56	62	134	12	12	24	220	0
860013	2016-06-07	1	63	7	1	152	p	3	28	31	122	15	2	17	170	1
861013	2015-05-12	0	63	7	1	152	p	13	40	53	181	14	5	19	253	1
862014	2015-07-16	0	67	7	1	152	p	3	47	50	176	14	13	27	253	1
864016	2016-02-02	1	78	8	1	152	p	13	47	60	171	19	4	23	254	1
865013	2016-02-09	1	60	7	1	152	p	5	43	48	147	24	5	29	224	1
866015	2015-01-13	0	70	8	1	152	p	2	50	52	242	10	11	21	315	0
868015	2016-02-04	1	72	8	1	152	p	16	37	53	136	19	6	25	214	1
869013	2014-12-25	0	62	7	1	152	p	2	49	51	193	15	7	22	266	0
870015	2015-08-25	0	74	8	1	152	p	7	48	55	141	5	13	18	214	0
871014	2015-09-01	0	69	7	1	152	p	8	43	51	185	22	3	25	261	0
872015	2015-02-12	0	70	8	1	152	p	3	44	47	203	8	12	20	270	0
873015	2015-12-08	0	72	8	1	152	p	6	42	48	138	10	10	20	206	1
874015	2016-04-19	1	70	8	1	152	p	8	29	37	118	24	4	28	183	1
875015	2016-05-17	1	70	8	1	152	p	5	33	38	148	29	5	34	220	1
878012	2015-03-19	0	56	6	1	152	p	3	31	34	264	14	5	19	317	1
879015	2016-01-07	1	71	8	1	152	p	5	54	59	150	22	7	29	238	1
880015	2016-03-08	1	71	8	1	152	p	7	44	51	142	14	4	18	211	1
881012	2015-07-30	0	57	6	1	152	p	3	38	41	136	18	4	22	199	1
882011	2016-03-03	1	53	6	1	152	p	7	33	40	168	9	8	17	225	1
885013	2015-06-25	0	60	7	1	152	p	11	52	63	201	13	6	19	283	0
888014	2016-04-14	1	67	7	1	152	p	2	44	46	160	11	10	21	227	1
890015	2015-06-09	0	71	8	1	152	p	1	36	37	144	16	0	16	197	0
891014	2016-02-18	1	67	7	1	152	p	5	39	44	128	23	2	25	197	1
892016	2015-10-22	0	75	8	1	152	p	6	52	58	153	14	6	20	231	1
893016	2016-02-25	1	75	8	1	152	p	10	45	55	120	12	6	18	193	1
894015	2016-01-05	1	72	8	1	152	p	11	46	57	180	12	8	20	257	1
895014	2016-01-19	1	67	7	1	152	p	14	39	53	159	18	7	25	237	1
897015	2015-04-07	0	74	8	1	152	p	13	48	61	199	24	2	26	286	0
898015	2015-03-10	0	72	8	1	152	p	4	42	46	341	48	8	56	443	0
901013	2015-11-24	0	64	7	1	152	p	2	37	39	116	12	4	16	171	0
902015	2016-01-05	1	74	8	1	152	p	3	36	39	108	14	3	17	164	1
903013	2016-04-28	1	63	7	1	152	p	9	49	58	137	13	8	21	216	1
904015	2015-03-05	0	71	8	1	152	p	9	44	53	247	14	22	36	336	0
905014	2015-09-08	0	69	7	1	152	p	10	48	58	201	16	5	21	280	0
907014	2015-03-26	0	67	7	1	152	p	2	43	45	201	15	5	20	266	0
908015	2015-05-19	0	71	8	1	152	p	2	45	47	142	22	6	28	217	0
909010	2016-06-07	1	46	5	1	152	p	5	33	38	202	21	1	22	262	0
910015	2015-06-02	0	71	8	1	152	p	3	44	47	141	21	0	21	209	0
911014	2015-10-13	0	68	7	1	152	p	6	36	42	140	18	6	24	206	1
912014	2014-12-16	0	69	7	1	152	p	10	46	56	195	16	6	22	273	1
913014	2015-10-01	0	67	7	1	152	p	5	42	47	168	24	1	25	240	1
914015	2016-03-24	1	72	8	1	152	p	4	50	54	170	22	3	25	249	1
915014	2015-04-09	0	65	7	1	152	p	7	34	41	184	25	5	30	255	0
916015	2015-04-23	0	70	8	1	152	p	8	33	41	146	14	4	18	205	0
917013	2015-11-26	0	60	7	1	152	p	8	44	52	198	20	2	22	272	0
918015	2015-02-10	0	70	8	1	152	p	5	28	33	144	19	1	20	197	1
920016	2015-10-22	0	77	8	1	152	p	9	44	53	131	25	8	33	217	0
921013	2016-04-26	1	63	7	1	152	p	4	37	41	158	6	6	12	211	1
923015	2015-04-16	0	71	8	1	152	p	0	39	39	173	37	2	39	251	0
924014	2015-02-17	0	69	7	1	152	p	20	30	50	207	15	26	41	298	0
927014	2016-04-07	1	65	7	1	152	p	2	39	41	133	5	8	13	187	1
929014	2015-12-24	1	68	7	1	152	p	11	44	55	122	12	15	27	204	1
931015	2015-04-07	0	71	8	1	152	p	1	50	51	155	15	12	27	233	0
933015	2015-03-24	0	71	8	1	152	p	4	36	40	144	10	5	15	199	0
934011	2015-06-30	0	54	6	1	152	p	6	38	44	277	13	7	20	341	1
936016	2015-02-26	0	79	8	1	152	p	4	44	48	237	31	11	42	327	0
937015	2015-03-31	0	73	8	1	152	p	3	44	47	173	22	1	23	243	1
939012	2015-05-19	0	56	6	1	152	p	8	43	51	152	16	7	23	226	1
940014	2015-08-18	0	68	7	1	152	p	22	17	39	124	3	14	17	180	1
942015	2015-10-29	0	74	8	1	152	p	9	46	55	138	12	0	12	205	0
943017	2015-12-08	0	80	9	1	152	p	4	40	44	130	10	5	15	189	0
944013	2015-02-05	0	64	7	1	152	p	10	42	52	152	14	7	21	225	0
946014	2015-05-26	0	66	7	1	152	p	6	46	52	216	11	5	16	284	1
948016	2016-03-08	1	76	8	1	152	p	6	27	33	126	18	1	19	178	1
949013	2015-12-17	1	61	7	1	152	p	11	35	46	159	10	18	28	233	1
950014	2015-05-21	0	68	7	1	152	p	6	45	51	217	16	19	35	303	1
951012	2015-08-27	0	58	6	1	152	p	14	36	50	193	5	11	16	259	0
954013	2015-11-10	0	60	7	1	152	p	11	28	39	120	10	6	16	175	1
955013	2015-07-28	0	62	7	1	153	p	25	62	87	269	30	6	36	392	0
957013	2015-09-11	0	62	7	1	154	l	15	53	68	426	8	37	45	539	0
958010	2015-07-10	0	45	5	1	155	l	7	74	81	510	23	4	27	618	0
959010	2015-07-01	0	45	5	2	156	r	6	59	65	250	17	4	21	336	0
962016	2016-04-07	1	77	8	1	158	p	21	43	64	560	36	9	45	669	0
963013	2015-12-01	0	60	7	1	158	p	28	49	77	386	24	13	37	500	0
964014	2015-12-03	0	66	7	1	158	p	30	49	79	493	36	1	37	609	0
965013	2015-03-26	0	64	7	1	159	p	13	82	95	612	31	9	40	747	0
966015	2015-10-30	0	70	8	2	160	l	13	73	86	641	39	2	41	768	0
968007	2015-03-24	0	30	4	2	161	p	3	84	87	320	31	10	41	448	0
969009	2015-03-05	0	44	5	1	161	p	20	61	81	301	23	0	23	405	0
970016	2015-01-22	0	78	8	1	161	p	13	48	61	209	22	6	28	298	0
971011	2015-02-19	0	53	6	1	161	p	19	86	105	293	22	6	28	426	0
972016	2015-05-26	0	78	8	1	161	p	22	20	42	291	29	10	39	372	0
973015	2015-01-20	0	74	8	2	162	p	25	52	77	169	26	6	32	278	0
975012	2015-01-15	0	58	6	1	162	p	6	76	82	372	29	1	30	484	0
977011	2015-01-29	0	53	6	2	162	p	23	39	62	249	23	0	23	334	0
981012	2015-01-27	0	58	6	2	162	p	8	63	71	305	13	13	26	402	0
985008	2016-01-21	1	39	4	1	165	p	6	41	47	201	30	0	30	278	0
986001	2015-02-25	0	1	1	2	166	i	3	77	80	312	26	5	31	423	0
987001	2015-07-08	0	0	1	1	167	i	4	83	87	188	17	0	17	292	0
988001	2015-06-10	0	0	1	1	167	i	5	37	42	277	16	0	16	335	0
990001	2015-11-26	0	0	1	2	167	i	15	42	57	241	12	1	13	311	0
992009	2015-10-23	0	41	5	1	169	b	4	31	35	204	9	7	16	255	0
993013	2016-06-10	1	63	7	2	170	b	6	26	32	84	20	5	25	141	0
994017	2016-02-12	1	83	9	2	171	b	4	34	38	77	19	3	22	137	0
996014	2015-12-18	1	67	7	2	171	b	7	29	36	157	16	3	19	212	0
997009	2016-03-04	1	43	5	1	171	b	2	25	27	171	14	2	16	214	0
999009	2015-02-21	0	42	5	2	172	5	7	30	37	45	7	17	24	106	0
1000013	2014-12-12	0	60	7	2	173	5	2	45	47	104	12	3	15	166	0
1001004	2014-12-17	0	17	2	2	178	5	12	50	62	106	14	13	27	195	0
1004001	2015-01-14	0	2	1	2	183	5	1	59	60	65	12	1	13	138	0
1005001	2015-02-07	0	2	1	1	184	5	4	54	58	52	18	1	19	129	0
1007001	2015-03-16	0	1	1	2	185	e	2	62	64	273	29	5	34	371	0
1008001	2015-02-25	0	1	1	1	186	e	3	18	21	53	22	5	27	101	0
1011003	2014-12-20	0	14	2	2	189	d	2	19	21	8	11	2	13	42	0
1012001	2016-03-30	1	2	1	2	189	e	14	14	28	102	21	2	23	153	0
1015003	2015-05-18	0	14	2	2	189	e	3	22	25	16	27	16	43	84	0
1016001	2016-01-13	1	2	1	2	189	e	16	32	48	31	23	5	28	107	0
1017001	2015-10-21	0	1	1	1	189	e	5	15	20	34	22	0	22	76	0
1020002	2015-06-29	0	9	1	1	191	e	6	10	16	45	15	1	16	77	0
1021004	2015-11-04	0	18	2	2	192	e	8	17	25	12	20	0	20	57	0
1022001	2015-12-10	0	0	1	2	192	e	5	26	31	27	15	6	21	79	1
1023001	2015-10-14	0	3	1	1	192	e	39	14	53	27	21	3	24	104	1
1024001	2016-05-02	1	1	1	2	192	e	3	12	15	12	12	7	19	46	1
1028003	2015-01-30	0	13	2	1	192	e	3	9	12	16	11	0	11	39	1
1029001	2016-01-06	1	2	1	2	192	e	15	46	61	58	29	3	32	151	1
1030001	2016-05-30	1	2	1	2	192	e	8	92	100	61	19	5	24	185	1
1032001	2015-12-21	1	2	1	2	192	e	25	20	45	29	25	6	31	105	1
1033001	2016-01-18	1	1	1	1	192	e	2	18	20	65	19	3	22	107	1
1035002	2016-01-18	1	9	1	2	192	e	3	15	18	21	37	3	40	79	1
1036001	2015-11-18	0	0	1	2	192	e	3	27	30	79	22	5	27	136	1
1037001	2016-06-03	1	0	1	1	192	e	8	20	28	16	19	5	24	68	1
1038001	2015-04-08	0	2	1	1	192	e	10	9	19	7	39	0	39	65	1
1039001	2015-03-18	0	2	1	1	192	e	4	21	25	34	14	3	17	76	1
1040002	2015-08-17	0	5	1	1	192	e	3	8	11	40	20	2	22	73	0
1041001	2015-11-18	0	2	1	2	192	e	9	8	17	6	20	0	20	43	1
1042001	2015-10-21	0	4	1	1	192	e	5	12	17	32	29	0	29	78	0
1043002	2016-06-06	1	6	1	2	192	e	4	9	13	46	13	1	14	73	0
1044001	2015-11-04	0	1	1	2	192	e	1	63	64	28	31	5	36	128	1
1045001	2016-03-23	1	2	1	2	192	e	5	29	34	34	21	7	28	96	0
1046003	2016-04-08	1	12	2	1	192	e	0	10	10	6	17	2	19	35	1
1047001	2015-11-18	0	1	1	2	192	e	12	54	66	44	17	1	18	128	1
1050002	2016-06-09	1	6	1	1	192	g	4	17	21	8	15	4	19	48	1
1053003	2015-07-29	0	12	2	2	192	e	17	24	41	11	20	0	20	72	0
1055001	2016-06-08	1	0	1	1	193	e	8	34	42	256	21	10	31	329	0
1056001	2015-08-19	0	2	1	2	194	e	0	18	18	40	25	0	25	83	0
1067001	2015-01-23	0	0	1	1	197	e	3	13	16	47	21	0	21	84	0
1071002	2015-10-26	0	7	1	1	200	e	7	26	33	46	31	23	54	133	0
1072002	2015-02-04	0	6	1	1	201	e	3	22	25	28	14	3	17	70	0
1074001	2015-09-09	0	0	1	1	201	e	9	35	44	43	27	1	28	115	1
1075001	2015-06-03	0	2	1	2	201	e	4	22	26	40	16	2	18	84	0
1076002	2015-12-21	1	7	1	1	201	e	7	9	16	66	11	6	17	99	1
1077001	2015-12-09	0	0	1	2	201	e	16	13	29	51	20	2	22	102	0
1082002	2014-12-12	0	5	1	2	204	e	5	16	21	16	17	7	24	61	0
1085004	2016-01-04	1	16	2	2	205	e	5	11	16	20	8	3	11	47	0
1086001	2016-02-17	1	2	1	2	205	e	12	4	16	29	0	15	15	60	0
1088003	2016-05-23	1	11	2	1	206	e	3	14	17	47	16	1	17	81	0
1089003	2016-05-16	1	11	2	1	206	e	3	13	16	70	13	0	13	99	0
1090002	2016-04-06	1	5	1	2	206	e	6	22	28	31	11	3	14	73	0
1091001	2016-04-02	1	4	1	1	207	e	0	9	9	9	21	1	22	40	0
1096005	2015-05-01	0	23	3	1	211	5	6	45	51	206	43	0	43	300	0
1099014	2015-01-23	0	69	7	1	214	b	5	70	75	265	39	0	39	379	0
1101014	2015-06-26	0	68	7	1	214	b	7	57	64	767	21	21	42	873	0
1102015	2016-05-25	1	70	8	1	214	b	11	54	65	414	33	3	36	515	1
1103012	2015-09-18	0	56	6	2	214	b	27	50	77	682	24	1	25	784	0
1104014	2015-02-13	0	68	7	1	214	b	9	37	46	111	20	5	25	182	0
1108014	2015-01-21	0	68	7	1	214	b	6	66	72	470	22	0	22	564	0
1109016	2015-11-20	0	76	8	1	214	b	3	49	52	642	32	19	51	745	1
1111011	2015-10-14	0	50	6	1	214	b	17	60	77	1063	25	6	31	1171	0
1112016	2016-05-06	1	77	8	1	214	b	15	60	75	651	46	5	51	777	0
1113016	2016-03-18	1	79	8	1	214	b	11	50	61	805	18	3	21	887	0
1116016	2016-03-16	1	75	8	1	215	b	9	42	51	78	14	0	14	143	1
1117014	2015-01-09	0	68	7	1	215	b	10	32	42	23	12	3	15	80	1
1120016	2015-10-02	0	76	8	1	215	b	7	16	23	39	16	0	16	78	1
1121013	2016-05-18	1	60	7	1	215	b	9	39	48	31	12	3	15	94	1
1122015	2016-01-27	1	74	8	1	215	b	9	59	68	29	12	1	13	110	0
1127014	2014-12-17	0	67	7	1	224	5	3	43	46	68	7	4	11	125	0
1128001	2016-01-16	1	0	1	1	225	k	5	49	54	35	41	8	49	138	0
1129008	2015-01-30	0	38	4	2	226	5	6	36	42	26	18	0	18	86	0
1141001	2016-05-16	1	2	1	1	239	e	6	14	20	25	10	1	11	56	0
1142003	2015-07-29	0	13	2	2	239	d	5	22	27	33	20	0	20	80	0
1144001	2015-01-23	0	1	1	2	241	5	0	31	31	39	15	0	15	85	0
1145007	2015-03-06	0	31	4	2	242	5	8	29	37	17	6	12	18	72	0
1146008	2015-12-02	0	39	4	1	243	5	2	59	61	381	17	1	18	460	0
1147011	2016-02-26	1	53	6	2	244	a	31	27	58	181	15	15	30	269	0
1149016	2015-01-23	0	79	8	1	246	5	3	30	33	67	15	2	17	117	0
1151007	2016-06-10	1	32	4	1	247	5	1	30	31	61	20	3	23	115	0
1152014	2015-07-29	0	66	7	1	248	5	16	57	73	156	13	1	14	243	0
1153014	2015-10-14	0	69	7	2	249	5	13	58	71	78	16	11	27	176	0
1154011	2015-02-27	0	51	6	2	249	5	7	48	55	134	24	19	43	232	0
1155004	2016-03-07	1	19	2	2	250	i	12	36	48	178	13	1	14	240	0
1156001	2015-04-01	0	0	1	1	251	i	13	63	76	424	7	0	7	507	0
1158015	2016-05-02	1	72	8	2	252	i	6	28	34	222	14	3	17	273	0
1161016	2015-02-12	0	75	8	1	252	i	9	43	52	248	10	0	10	310	0
1163013	2015-06-11	0	64	7	2	252	i	9	33	42	303	11	32	43	388	0
1164011	2015-05-25	0	50	6	1	252	i	9	37	46	329	6	2	8	383	0
1165016	2015-10-26	0	77	8	1	252	i	9	34	43	307	12	2	14	364	0
1169001	2015-07-06	0	3	1	1	256	e	6	37	43	43	37	2	39	125	0
1172009	2014-12-17	0	43	5	2	257	5	9	69	78	166	14	3	17	261	0
1174012	2015-06-24	0	55	6	2	258	5	15	30	45	75	6	8	14	134	0
1181001	2015-07-06	0	1	1	1	264	e	3	39	42	85	13	1	14	141	1
1182002	2016-03-30	1	8	1	1	264	e	5	38	43	119	0	10	10	172	1
1184001	2014-12-24	0	3	1	2	266	5	2	80	82	123	14	1	15	220	0
1187001	2015-03-06	0	1	1	1	269	5	4	60	64	54	12	1	13	131	0
1188001	2015-11-06	0	2	1	1	278	e	3	34	37	23	26	4	30	90	0
1189001	2015-08-13	0	1	1	1	278	e	2	48	50	33	14	0	14	97	0
1191002	2015-09-02	0	7	1	1	279	e	2	56	58	49	20	0	20	127	0
1193001	2015-03-20	0	1	1	1	280	e	1	21	22	29	19	2	21	72	0
1195001	2015-11-06	0	3	1	1	281	e	1	22	23	31	22	1	23	77	0
1196001	2015-02-07	0	3	1	1	281	e	4	30	34	33	11	7	18	85	0
1202001	2015-03-09	0	1	1	1	281	e	6	29	35	32	18	5	23	90	0
1206001	2014-12-17	0	2	1	1	281	e	0	24	24	27	5	1	6	57	0
1215001	2015-03-06	0	2	1	1	281	e	7	15	22	40	7	6	13	75	1
1216001	2015-03-13	0	3	1	1	281	e	4	14	18	23	14	1	15	56	0
1217001	2015-01-14	0	3	1	1	281	e	3	39	42	125	18	2	20	187	0
1222001	2015-01-22	0	2	1	1	281	e	7	27	34	54	6	8	14	102	0
1223001	2015-05-08	0	3	1	1	281	e	3	22	25	34	13	1	14	73	0
1224001	2015-12-11	0	2	1	1	281	e	10	28	38	30	9	3	12	80	0
1225001	2016-05-12	1	2	1	1	281	e	8	24	32	50	13	2	15	97	1
1227001	2016-05-02	1	2	1	1	281	e	7	21	28	37	6	4	10	75	1
1230001	2014-12-25	0	4	1	1	281	e	1	22	23	53	21	1	22	98	1
1232001	2015-08-03	0	2	1	1	281	e	17	23	40	40	16	1	17	97	0
1237001	2015-11-26	0	2	1	1	281	e	4	52	56	66	23	3	26	148	0
1239001	2015-02-19	0	1	1	1	281	e	8	25	33	51	49	0	49	133	1
1240001	2016-02-26	1	4	1	1	281	e	1	25	26	44	12	0	12	82	1
1243001	2016-03-11	1	4	1	1	281	e	6	26	32	28	14	2	16	76	1
1250001	2015-01-30	0	3	1	1	281	e	4	25	29	29	9	0	9	67	0
1251001	2014-12-19	0	3	1	1	281	e	3	26	29	48	18	8	26	103	1
1254001	2015-12-11	0	4	1	1	281	e	1	27	28	27	12	3	15	70	1
1255001	2015-02-02	0	3	1	1	281	e	3	38	41	61	6	1	7	109	0
1258002	2015-12-14	1	5	1	1	281	e	3	21	24	43	22	7	29	96	1
1262001	2015-03-13	0	2	1	1	281	e	8	21	29	61	6	9	15	105	1
1266001	2015-04-08	0	3	1	1	281	e	0	44	44	35	18	0	18	97	1
1268001	2015-03-13	0	2	1	1	281	e	8	15	23	30	6	8	14	67	0
1272001	2015-03-28	0	3	1	1	281	e	0	30	30	34	10	0	10	74	0
1273002	2015-06-24	0	5	1	1	281	e	2	22	24	54	17	0	17	95	1
1274002	2014-12-15	0	5	1	1	281	e	3	29	32	30	15	2	17	79	0
1279001	2015-01-14	0	1	1	1	281	e	3	47	50	83	7	3	10	143	0
1282002	2016-05-21	1	5	1	1	281	e	3	33	36	31	21	4	25	92	1
1285001	2016-01-08	1	4	1	1	281	e	6	35	41	26	9	5	14	81	1
1289001	2015-04-17	0	2	1	1	281	e	4	17	21	27	7	0	7	55	0
1294002	2016-02-26	1	5	1	1	281	e	3	25	28	51	13	1	14	93	1
1295001	2016-05-19	1	3	1	1	281	e	4	27	31	67	18	1	19	117	1
1297001	2015-07-03	0	3	1	1	281	e	6	19	25	28	24	0	24	77	0
1298001	2015-08-21	0	4	1	1	281	e	2	26	28	26	22	0	22	76	0
1306001	2015-02-07	0	2	1	1	281	e	3	34	37	35	11	1	12	84	1
1308001	2016-06-09	1	2	1	1	281	e	2	25	27	35	20	3	23	85	1
1310001	2015-01-17	0	2	1	1	281	e	5	13	18	25	9	0	9	52	0
1314002	2015-10-08	0	5	1	1	281	e	6	36	42	54	21	0	21	117	0
1316001	2015-08-20	0	2	1	1	281	e	0	23	23	37	17	6	23	83	1
1317001	2015-01-08	0	1	1	1	281	e	0	28	28	34	12	2	14	76	0
1318002	2014-12-19	0	6	1	1	281	e	7	25	32	26	6	5	11	69	0
1319001	2015-03-30	0	1	1	1	281	e	13	23	36	40	13	4	17	93	0
1322001	2015-10-28	0	2	1	1	284	e	7	39	46	36	6	2	8	90	0
1323001	2015-09-04	0	2	1	1	285	e	3	29	32	43	17	0	17	92	0
1325002	2015-10-16	0	6	1	1	287	e	9	18	27	26	17	0	17	70	0
1333012	2015-11-18	0	59	6	2	295	k	5	37	42	117	11	6	17	176	0
1341001	2015-09-02	0	0	1	1	300	e	6	32	38	54	27	13	40	132	0
1344001	2016-03-11	1	1	1	1	305	i	1	91	92	353	20	1	21	466	0
1346004	2014-12-19	0	17	2	2	309	e	3	22	25	19	6	2	8	52	0
1347001	2016-06-01	1	0	1	1	310	e	15	42	57	74	25	4	29	160	0
1348001	2015-12-07	0	1	1	2	311	e	7	33	40	11	18	0	18	69	0
1349001	2016-01-29	1	2	1	1	311	e	6	16	22	36	16	0	16	74	0
1350003	2016-04-25	1	13	2	1	311	e	4	13	17	17	6	3	9	43	0
1353001	2015-06-19	0	0	1	2	314	e	3	31	34	12	16	1	17	63	0
1354001	2015-08-19	0	0	1	1	314	e	4	27	31	2	19	4	23	56	0
1355001	2015-05-18	0	0	1	2	314	e	2	64	66	10	5	19	24	100	0
1356003	2016-04-07	1	11	2	2	315	e	0	32	32	39	9	3	12	83	0
1357001	2015-01-24	0	0	1	2	315	e	6	51	57	49	19	0	19	125	0
1358001	2015-11-27	0	3	1	1	315	e	6	29	35	38	14	0	14	87	0
1359001	2015-02-27	0	4	1	2	315	e	11	30	41	33	2	19	21	95	0
1361001	2015-12-03	0	0	1	2	316	e	0	44	44	34	11	7	18	96	1
1362001	2015-12-18	1	1	1	2	316	e	12	32	44	41	51	0	51	136	1
1369003	2015-01-07	0	12	2	1	316	e	9	32	41	100	23	3	26	167	0
1370002	2014-12-26	0	7	1	2	316	e	3	34	37	55	14	6	20	112	0
1372003	2015-01-09	0	12	2	2	316	e	4	25	29	33	15	0	15	77	0
1378001	2016-04-01	1	1	1	1	316	e	10	35	45	41	17	4	21	107	1
1379001	2015-06-17	0	0	1	2	316	e	2	28	30	125	28	5	33	188	0
1381001	2015-09-30	0	2	1	1	316	e	15	44	59	38	22	7	29	126	1
1382001	2014-12-17	0	0	1	2	316	e	1	32	33	28	13	0	13	74	0
1384001	2015-08-10	0	1	1	1	316	e	2	40	42	35	17	0	17	94	0
1387001	2015-08-03	0	0	1	1	316	e	5	98	103	102	45	1	46	251	0
1388001	2015-04-19	0	0	1	2	316	e	3	42	45	76	11	0	11	132	0
1389001	2015-09-30	0	0	1	2	316	e	16	70	86	114	26	2	28	228	0
1392001	2015-10-07	0	1	1	1	318	e	7	27	34	40	4	21	25	99	0
1394002	2015-07-24	0	7	1	2	320	e	5	33	38	48	10	8	18	104	0
1395001	2016-03-27	1	0	1	2	321	e	13	26	39	15	37	2	39	93	0
1396001	2015-09-14	0	2	1	1	322	e	3	38	41	13	15	2	17	71	0
1398001	2015-02-13	0	0	1	2	323	e	0	44	44	62	13	11	24	130	1
1399001	2015-04-22	0	1	1	1	323	e	2	30	32	23	23	0	23	78	0
1400001	2016-03-09	1	1	1	2	323	e	6	39	45	74	14	3	17	136	1
1402001	2015-05-25	0	2	1	1	323	e	8	32	40	34	41	35	76	150	0
1404001	2015-08-03	0	0	1	2	323	e	23	42	65	55	23	2	25	145	1
1405001	2015-04-27	0	0	1	2	323	e	0	46	46	37	7	22	29	112	0
1406001	2016-01-10	1	2	1	1	323	e	7	28	35	37	12	2	14	86	1
1407001	2016-02-08	1	1	1	2	323	e	1	33	34	38	18	2	20	92	1
1408001	2015-04-01	0	2	1	1	323	e	0	23	23	18	22	0	22	63	1
1409001	2015-04-15	0	0	1	2	323	e	2	29	31	22	24	1	25	78	0
1410001	2015-08-10	0	2	1	1	323	e	5	39	44	19	15	1	16	79	0
1411001	2015-11-07	0	1	1	2	324	e	9	33	42	51	37	0	37	130	0
1412003	2015-10-06	0	11	2	2	324	e	7	45	52	22	20	8	28	102	0
1413005	2016-01-08	1	21	3	1	324	e	0	44	44	46	21	3	24	114	0
1414001	2015-11-25	0	2	1	1	324	e	12	29	41	22	25	5	30	93	1
1415003	2015-06-10	0	10	2	1	324	e	1	89	90	33	34	6	40	163	0
1416001	2015-06-10	0	1	1	1	324	e	5	30	35	51	19	0	19	105	0
1418002	2016-03-11	1	8	1	2	324	e	6	32	38	43	8	3	11	92	1
1419003	2015-03-19	0	13	2	2	324	e	6	48	54	57	13	7	20	131	0
1420005	2016-05-25	1	21	3	1	324	e	4	44	48	46	29	6	35	129	0
1421001	2015-07-01	0	1	1	2	324	e	2	36	38	51	22	0	22	111	0
1423003	2015-07-29	0	13	2	2	324	e	20	34	54	44	12	4	16	114	0
1424001	2016-01-22	1	3	1	1	324	e	9	31	40	22	23	7	30	92	1
1425001	2016-01-13	1	0	1	1	324	e	7	53	60	137	73	7	80	277	1
1427001	2015-11-02	0	0	1	1	324	e	7	37	44	62	12	5	17	123	1
1428001	2016-06-08	1	0	1	1	324	e	3	33	36	126	14	4	18	180	1
1429001	2015-07-18	0	1	1	1	324	e	8	27	35	34	10	3	13	82	1
1430002	2015-10-14	0	9	1	2	324	e	16	25	41	60	20	1	21	122	1
1431002	2016-02-27	1	5	1	1	324	e	8	29	37	42	6	2	8	87	1
1432001	2015-06-15	0	0	1	2	324	e	7	59	66	57	14	1	15	138	0
1433001	2015-11-20	0	3	1	1	324	e	15	34	49	44	10	2	12	105	1
1434003	2015-02-05	0	12	2	1	325	e	6	24	30	11	20	12	32	73	0
1437002	2014-12-24	0	5	1	2	327	e	1	34	35	44	17	5	22	101	0
1438003	2014-12-24	0	14	2	1	330	5	5	48	53	206	10	2	12	271	0
1440007	2016-04-14	1	32	4	2	332	9	11	13	24	25	15	7	22	71	0
1441012	2016-01-20	1	57	6	2	333	b	8	52	60	381	17	5	22	463	0
1442011	2015-11-13	0	51	6	2	334	5	8	72	80	422	20	1	21	523	1
1443010	2015-06-12	0	46	5	2	334	5	7	64	71	489	21	0	21	581	0
1445011	2016-05-11	1	53	6	2	334	5	2	31	33	151	5	14	19	203	1
1454016	2015-05-25	0	79	8	2	336	m	4	48	52	104	17	1	18	174	0
1456013	2015-03-18	0	60	7	2	336	m	0	37	37	144	8	8	16	197	0
1464011	2015-05-21	0	53	6	2	336	m	3	45	48	103	26	2	28	179	0
1470018	2015-03-05	0	85	9	2	336	m	10	33	43	94	11	9	20	157	0
1475008	2015-03-23	0	39	4	2	336	m	14	28	42	77	9	3	12	131	0
1481009	2015-01-29	0	41	5	2	336	m	5	54	59	151	14	5	19	229	0
1484009	2015-01-15	0	41	5	2	336	m	4	31	35	94	17	14	31	160	0
1485010	2015-03-04	0	49	5	2	336	m	4	35	39	109	16	5	21	169	0
1488012	2015-06-04	0	58	6	2	336	m	6	46	52	147	26	4	30	229	0
1489016	2015-04-06	0	77	8	2	336	m	6	32	38	109	9	7	16	163	0
1495012	2015-02-19	0	55	6	2	336	m	7	35	42	117	17	27	44	203	0
1497016	2015-04-30	0	79	8	2	336	m	5	45	50	91	19	3	22	163	0
1498010	2015-02-16	0	46	5	2	336	m	3	53	56	136	5	11	16	208	0
1501009	2015-02-25	0	40	5	2	336	m	5	31	36	158	7	4	11	205	0
1504009	2015-05-20	0	40	5	2	336	m	5	23	28	72	21	6	27	127	0
1505010	2015-04-09	0	45	5	2	336	m	1	36	37	93	15	19	34	164	0
1506009	2015-02-05	0	43	5	2	336	m	13	46	59	119	17	8	25	203	0
1507010	2015-05-21	0	45	5	2	336	m	5	37	42	168	12	15	27	237	0
1511017	2015-02-26	0	81	9	2	336	m	8	43	51	129	23	5	28	208	0
1517011	2015-01-08	0	52	6	2	336	m	3	38	41	172	8	3	11	224	0
1519016	2015-04-20	0	77	8	2	336	m	18	35	53	73	8	11	19	145	0
1520017	2015-01-28	0	82	9	2	336	m	4	31	35	131	13	2	15	181	0
1522009	2014-12-25	0	43	5	2	336	m	8	35	43	102	11	7	18	163	0
1524016	2015-03-09	0	78	8	2	336	m	5	36	41	96	13	5	18	155	0
1525012	2015-05-14	0	56	6	2	336	m	11	45	56	111	12	10	22	189	0
1528007	2015-02-18	0	30	4	2	336	m	7	33	40	176	8	6	14	230	0
1530010	2015-03-12	0	46	5	2	336	m	7	36	43	89	14	6	20	152	0
1531016	2015-04-27	0	75	8	2	336	m	13	36	49	78	13	10	23	150	0
1532012	2015-02-25	0	56	6	2	336	m	5	27	32	71	12	9	21	124	0
1533010	2015-01-14	0	46	5	2	336	m	8	34	42	136	17	1	18	196	0
1534010	2015-03-18	0	47	5	2	336	m	0	29	29	124	15	5	20	173	0
1536013	2015-03-02	0	61	7	2	336	m	8	28	36	141	15	1	16	193	0
1537014	2015-04-01	0	65	7	2	336	m	7	32	39	101	6	8	14	154	0
1541011	2015-02-19	0	53	6	2	336	m	4	34	38	104	18	3	21	163	0
1544011	2014-12-17	0	54	6	2	336	m	6	32	38	98	8	4	12	148	0
1546013	2015-04-30	0	60	7	2	336	m	0	39	39	107	26	29	55	201	0
1548009	2015-05-11	0	43	5	2	336	m	6	42	48	156	9	8	17	221	0
1549017	2015-05-07	0	81	9	2	336	m	14	30	44	94	26	15	41	179	0
1550015	2015-02-19	0	73	8	2	336	m	12	44	56	81	13	14	27	164	0
1561014	2015-01-29	0	69	7	2	336	m	10	35	45	76	14	6	20	141	0
1563014	2015-04-15	0	65	7	2	336	m	11	28	39	90	22	0	22	151	0
1565017	2015-02-09	0	80	9	2	336	m	7	33	40	142	12	3	15	197	0
1566012	2015-04-16	0	56	6	2	336	m	5	30	35	79	11	0	11	125	0
1568015	2015-04-09	0	70	8	2	336	m	2	31	33	95	8	13	21	149	0
1571009	2015-03-26	0	44	5	2	336	m	4	40	44	91	9	3	12	147	0
1572012	2015-03-05	0	58	6	2	336	m	11	38	49	148	12	4	16	213	0
1575010	2015-03-25	0	48	5	2	336	m	3	34	37	227	10	4	14	278	0
1577010	2015-02-05	0	49	5	2	336	m	10	43	53	95	11	8	19	167	0
1579010	2015-04-13	0	48	5	2	336	m	6	40	46	194	17	3	20	260	0
1583013	2015-02-12	0	60	7	2	336	m	2	51	53	143	20	9	29	225	0
1584010	2015-05-27	0	49	5	2	336	m	5	33	38	144	11	2	13	195	0
1586012	2015-02-12	0	58	6	2	336	m	2	44	46	113	4	14	18	177	0
1587009	2015-02-02	0	43	5	2	336	m	11	46	57	170	12	4	16	243	0
1588015	2015-03-16	0	73	8	2	336	m	9	29	38	118	9	2	11	167	0
1589007	2015-03-12	0	32	4	2	336	m	7	48	55	89	10	1	11	155	0
1591011	2015-02-04	0	51	6	2	336	m	2	37	39	170	8	5	13	222	0
1598014	2015-01-22	0	65	7	2	336	m	5	37	42	150	20	3	23	215	0
1599015	2015-01-08	0	73	8	2	336	m	26	43	69	99	12	11	23	191	0
1602013	2015-04-30	0	62	7	2	336	m	4	38	42	97	20	0	20	159	0
1607012	2015-05-21	0	55	6	2	336	m	7	50	57	254	19	0	19	330	0
1608009	2015-04-22	0	41	5	2	336	m	5	48	53	201	7	5	12	266	0
1609009	2014-12-18	0	44	5	2	336	m	8	34	42	143	21	0	21	206	0
1611007	2015-05-20	0	34	4	2	336	m	10	27	37	126	12	4	16	179	0
1616017	2015-05-25	0	81	9	2	336	m	9	36	45	166	19	2	21	232	0
1617008	2015-04-22	0	39	4	2	336	m	1	23	24	69	16	5	21	114	0
1622011	2015-03-09	0	54	6	2	336	m	4	51	55	156	8	9	17	228	0
1625012	2015-11-05	0	56	6	2	337	m	12	28	40	102	13	9	22	164	1
1626016	2015-11-26	0	75	8	2	337	m	9	30	39	120	14	6	20	179	0
1627014	2016-05-12	1	67	7	2	337	m	7	38	45	112	14	4	18	175	1
1628009	2015-11-02	0	42	5	2	337	m	10	26	36	138	11	11	22	196	1
1629016	2015-06-03	0	78	8	2	337	m	4	27	31	176	29	1	30	237	1
1631015	2015-05-18	0	74	8	2	337	m	3	38	41	151	10	7	17	209	1
1632008	2015-10-14	0	37	4	2	337	m	3	26	29	91	18	0	18	138	1
1636009	2015-01-28	0	44	5	2	337	m	4	28	32	148	12	3	15	195	1
1638011	2016-01-04	1	53	6	2	337	m	3	35	38	200	18	0	18	256	1
1639016	2016-05-18	1	77	8	2	337	m	2	27	29	90	18	9	27	146	1
1640015	2016-02-25	1	71	8	2	337	m	2	34	36	122	16	7	23	181	1
1642010	2016-03-23	1	47	5	2	337	m	10	32	42	164	10	1	11	217	1
1643009	2016-05-09	1	41	5	2	337	m	4	30	34	92	19	0	19	145	1
1644012	2015-07-29	0	56	6	2	337	m	6	24	30	138	7	5	12	180	1
1645011	2015-11-19	0	53	6	2	337	m	8	35	43	187	18	5	23	253	0
1646013	2016-03-16	1	64	7	2	337	m	2	27	29	113	10	5	15	157	1
1650011	2016-01-28	1	54	6	2	337	m	4	32	36	115	5	9	14	165	1
1651010	2015-12-09	0	49	5	2	337	m	9	22	31	112	13	6	19	162	1
1652010	2015-11-16	0	46	5	2	337	m	7	34	41	178	15	6	21	240	0
1654014	2016-02-22	1	65	7	2	337	m	16	29	45	134	17	2	19	198	1
1655014	2015-10-28	0	66	7	2	337	m	8	30	38	121	15	4	19	178	1
1656008	2016-05-19	1	39	4	2	337	m	3	51	54	343	31	11	42	439	1
1657011	2015-10-05	0	54	6	2	337	m	8	36	44	178	10	2	12	234	1
1662015	2015-02-09	0	70	8	2	337	m	2	38	40	115	21	0	21	176	0
1663014	2016-02-29	1	67	7	2	337	m	4	36	40	175	18	2	20	235	1
1664009	2016-02-25	1	41	5	2	337	m	1	33	34	162	11	8	19	215	1
1665015	2015-11-30	0	72	8	2	337	m	9	29	38	151	15	6	21	210	0
1666008	2015-12-07	0	39	4	2	337	m	10	42	52	160	12	9	21	233	1
1667014	2016-05-12	1	69	7	2	337	m	11	35	46	127	16	3	19	192	0
1668016	2015-09-24	0	78	8	2	337	m	7	41	48	145	22	0	22	215	1
1669012	2016-02-03	1	56	6	2	337	m	9	27	36	156	12	6	18	210	1
1672006	2014-12-15	0	29	3	2	337	m	5	37	42	154	33	8	41	237	0
1674012	2015-04-06	0	59	6	2	337	m	0	36	36	177	10	4	14	227	0
1675009	2016-02-25	1	40	5	2	337	m	3	30	33	177	14	5	19	229	1
1676012	2015-09-10	0	57	6	2	337	m	6	31	37	143	8	10	18	198	0
1678011	2015-06-24	0	50	6	2	337	m	3	27	30	113	15	6	21	164	0
1680015	2015-05-20	0	72	8	2	337	m	5	28	33	144	11	6	17	194	0
1681010	2015-06-18	0	46	5	2	337	m	6	35	41	175	15	0	15	231	1
1682018	2015-09-10	0	89	9	2	337	m	9	38	47	144	6	15	21	212	0
1683010	2015-05-07	0	48	5	2	337	m	10	38	48	74	71	5	76	198	0
1684015	2015-06-24	0	74	8	2	337	m	2	35	37	182	9	4	13	232	0
1686008	2016-04-14	1	38	4	2	337	m	9	35	44	118	13	7	20	182	1
1689014	2015-04-13	0	68	7	2	337	m	6	40	46	186	7	16	23	255	1
1691012	2015-03-04	0	56	6	2	337	m	1	39	40	141	14	0	14	195	0
1692010	2015-09-14	0	46	5	2	337	m	5	30	35	135	20	0	20	190	1
1696008	2015-11-04	0	39	4	2	337	m	0	27	27	101	12	4	16	144	0
1698012	2015-03-11	0	58	6	2	337	m	6	29	35	121	19	3	22	178	0
1699010	2015-10-15	0	47	5	2	337	m	15	38	53	141	17	4	21	215	0
1700014	2015-08-31	0	67	7	2	337	m	5	42	47	202	15	5	20	269	1
1702012	2015-08-19	0	57	6	2	337	m	7	30	37	148	16	1	17	202	0
1703014	2015-02-02	0	66	7	2	337	m	24	34	58	181	14	9	23	262	1
1704009	2015-01-22	0	44	5	2	337	m	4	48	52	119	17	1	18	189	1
1707008	2014-12-17	0	39	4	2	337	m	2	29	31	118	12	3	15	164	1
1708012	2015-02-18	0	57	6	2	337	m	3	33	36	161	2	9	11	208	0
1709012	2015-05-25	0	55	6	2	337	m	6	32	38	138	9	19	28	204	0
1710010	2015-09-16	0	45	5	2	337	m	3	28	31	95	22	6	28	154	1
1711010	2016-03-17	1	47	5	2	337	m	3	37	40	196	16	1	17	253	1
1714013	2016-01-21	1	64	7	2	337	m	3	42	45	163	8	9	17	225	0
1715010	2015-04-06	0	46	5	2	337	m	3	33	36	129	14	4	18	183	0
1716009	2016-03-02	1	43	5	2	337	m	4	22	26	143	68	3	71	240	1
1719010	2016-03-03	1	47	5	2	337	m	8	32	40	156	4	5	9	205	1
1720008	2015-10-29	0	36	4	2	337	m	14	35	49	155	8	9	17	221	1
1725009	2015-06-10	0	43	5	2	337	m	7	24	31	164	10	13	23	218	1
1728010	2016-01-06	1	46	5	2	337	m	8	40	48	190	12	9	21	259	1
1729017	2015-03-25	0	80	9	2	337	m	3	42	45	183	11	4	15	243	0
1731008	2016-04-07	1	36	4	2	337	m	3	36	39	154	19	0	19	212	1
1732015	2016-01-25	1	70	8	2	337	m	14	35	49	277	9	16	25	351	1
1733010	2016-04-07	1	46	5	2	337	m	8	38	46	121	17	4	21	188	1
1734009	2015-03-26	0	42	5	2	337	m	8	29	37	160	6	9	15	212	1
1738008	2016-05-25	1	35	4	2	337	m	5	29	34	130	22	1	23	187	1
1740015	2014-12-18	0	73	8	1	337	m	8	42	50	124	11	3	14	188	0
1743009	2016-02-10	1	40	5	2	337	m	6	40	46	121	10	1	11	178	1
1744012	2015-08-05	0	56	6	2	337	m	18	46	64	171	13	4	17	252	0
1745010	2015-05-13	0	46	5	2	337	m	6	23	29	103	10	7	17	149	0
1747010	2015-02-12	0	46	5	2	337	m	6	47	53	174	7	18	25	252	1
1748015	2015-12-16	1	71	8	2	338	m	10	44	54	64	7	5	12	130	1
1749011	2016-06-06	1	50	6	2	338	m	6	25	31	127	9	2	11	169	1
1750017	2016-05-11	1	83	9	2	338	m	13	29	42	65	11	7	18	125	0
1752011	2015-09-16	0	54	6	2	338	m	5	25	30	87	7	3	10	127	1
1753016	2015-08-03	0	79	8	2	338	m	2	47	49	265	12	8	20	334	1
1755009	2015-03-30	0	42	5	2	338	m	0	40	40	126	6	1	7	173	0
1757009	2015-10-29	0	43	5	2	338	m	10	38	48	71	11	7	18	137	0
1758011	2015-01-21	0	50	6	2	338	m	5	35	40	62	20	2	22	124	1
1759006	2015-06-01	0	28	3	2	338	m	8	42	50	156	8	6	14	220	0
1760012	2016-04-20	1	55	6	2	338	m	7	46	53	59	9	4	13	125	1
1761014	2015-06-01	0	67	7	2	338	m	9	35	44	173	10	10	20	237	0
1762016	2015-08-13	0	77	8	2	339	m	4	34	38	133	12	4	16	187	1
1763014	2015-08-06	0	66	7	2	339	m	17	43	60	100	24	2	26	186	0
1764014	2015-11-19	0	69	7	2	339	m	23	39	62	78	13	9	22	162	1
1765017	2016-02-22	1	82	9	2	339	m	4	31	35	84	18	4	22	141	1
1766016	2015-10-22	0	78	8	2	339	m	11	40	51	98	34	7	41	190	1
1767016	2015-08-20	0	77	8	2	339	m	10	38	48	104	16	1	17	169	1
1768014	2015-09-17	0	67	7	2	339	m	12	41	53	112	9	8	17	182	1
1769016	2016-04-11	1	77	8	2	339	m	9	32	41	95	24	0	24	160	1
1770011	2015-06-25	0	51	6	2	339	m	10	88	98	157	18	5	23	278	1
1771009	2015-11-26	0	43	5	2	339	m	8	37	45	106	11	8	19	170	1
1772009	2016-03-30	1	41	5	2	339	m	8	37	45	79	13	1	14	138	1
1773009	2016-02-18	1	44	5	2	339	m	8	41	49	96	10	8	18	163	1
1774014	2015-07-30	0	66	7	2	339	m	3	38	41	91	6	13	19	151	1
1775009	2015-06-25	0	42	5	2	339	m	9	40	49	127	14	4	18	194	0
1776009	2016-02-04	1	44	5	2	339	m	7	25	32	136	18	7	25	193	1
1777009	2015-10-14	0	43	5	2	339	m	1	32	33	210	10	2	12	255	1
1778015	2016-03-16	1	74	8	2	339	m	7	32	39	120	10	4	14	173	1
1779012	2015-11-26	0	58	6	2	339	m	13	37	50	95	14	6	20	165	1
1780013	2015-07-29	0	64	7	2	339	m	7	28	35	146	13	5	18	199	1
1781010	2016-02-01	1	47	5	2	339	m	7	42	49	191	17	2	19	259	1
1782012	2016-03-31	1	56	6	2	339	m	7	37	44	70	9	9	18	132	1
1783009	2015-07-22	0	43	5	2	339	m	2	40	42	179	9	3	12	233	1
1784011	2016-06-08	1	50	6	2	339	m	2	20	22	60	14	0	14	96	1
1785014	2015-12-24	1	67	7	2	339	m	7	49	56	105	12	3	15	176	1
1786013	2016-04-11	1	60	7	2	339	m	11	29	40	206	10	10	20	266	1
1787014	2016-01-27	1	66	7	2	339	m	2	34	36	147	12	8	20	203	1
1788012	2015-12-14	1	55	6	2	339	m	4	38	42	90	13	8	21	153	1
1789012	2015-10-07	0	58	6	2	339	m	3	41	44	154	26	4	30	228	1
1790012	2016-03-07	1	57	6	2	339	m	12	31	43	108	9	9	18	169	1
1791008	2015-07-08	0	37	4	2	339	m	9	37	46	115	10	3	13	174	1
1792014	2015-09-30	0	66	7	2	339	m	16	30	46	103	16	4	20	169	1
1793011	2016-06-02	1	51	6	2	339	m	6	29	35	148	11	3	14	197	1
1794011	2016-06-09	1	51	6	2	339	m	6	26	32	145	12	3	15	192	1
1795015	2016-01-28	1	74	8	2	339	m	2	46	48	92	13	5	18	158	1
1796017	2016-04-27	1	81	9	2	339	m	6	31	37	65	21	3	24	126	1
1797015	2015-10-19	0	72	8	2	339	m	6	34	40	105	12	3	15	160	1
1798009	2016-03-03	1	41	5	2	339	m	0	35	35	170	9	2	11	216	1
1799010	2016-04-13	1	45	5	2	339	m	17	24	41	156	14	9	23	220	1
1800009	2015-10-19	0	43	5	2	339	m	0	39	39	156	18	0	18	213	1
1801010	2015-09-02	0	49	5	2	339	m	4	18	22	69	10	4	14	105	1
1802009	2016-04-04	1	42	5	2	339	m	6	37	43	156	15	7	22	221	1
1803010	2015-08-05	0	48	5	2	339	m	2	36	38	85	16	0	16	139	1
1804014	2016-03-31	1	67	7	2	339	m	6	30	36	72	9	7	16	124	1
1805008	2015-06-15	0	38	4	2	339	m	4	30	34	176	16	1	17	227	1
1806013	2016-05-02	1	64	7	2	339	m	5	27	32	76	20	2	22	130	1
1807010	2016-04-07	1	48	5	2	339	m	5	30	35	88	13	1	14	137	1
1808014	2015-11-25	0	65	7	2	339	m	8	31	39	94	12	1	13	146	1
1809008	2016-02-15	1	37	4	2	339	m	19	40	59	192	27	2	29	280	1
1810016	2015-12-07	0	76	8	2	339	m	7	35	42	80	11	11	22	144	1
1811012	2016-02-03	1	56	6	2	339	m	4	19	23	88	10	8	18	129	1
1812014	2015-12-02	0	69	7	2	339	m	7	29	36	100	7	4	11	147	0
1813008	2016-02-24	1	39	4	2	339	m	4	48	52	115	9	4	13	180	1
1814008	2015-06-10	0	39	4	2	339	m	9	40	49	113	7	9	16	178	1
1815015	2016-05-30	1	72	8	2	339	m	6	35	41	83	16	6	22	146	1
1816009	2016-05-16	1	41	5	2	339	m	11	38	49	140	15	7	22	211	1
1817010	2015-11-11	0	48	5	2	339	m	6	33	39	137	13	2	15	191	1
1818009	2015-11-16	0	42	5	2	339	m	5	31	36	125	15	2	17	178	0
1819010	2015-09-07	0	47	5	2	339	m	8	39	47	116	12	8	20	183	0
1820016	2015-07-30	0	75	8	2	339	m	12	27	39	78	8	9	17	134	1
1821009	2015-07-15	0	40	5	2	339	m	9	37	46	167	16	4	20	233	1
1822014	2015-11-18	0	67	7	2	339	m	18	35	53	76	15	3	18	147	0
1823015	2015-12-28	1	73	8	2	339	m	6	40	46	139	18	3	21	206	1
1824010	2015-10-28	0	49	5	2	339	m	0	35	35	99	12	2	14	148	1
1825010	2016-03-28	1	46	5	2	339	m	9	31	40	97	13	6	19	156	1
1826012	2016-03-24	1	59	6	2	339	m	5	36	41	184	14	0	14	239	1
1827011	2015-06-22	0	50	6	2	339	m	3	36	39	119	10	2	12	170	1
1828012	2015-06-17	0	56	6	2	339	m	7	26	33	104	9	2	11	148	1
1829017	2016-01-28	1	84	9	2	339	m	10	30	40	96	23	0	23	159	0
1830012	2016-02-17	1	56	6	2	339	m	0	28	28	128	10	2	12	168	1
1831014	2016-04-15	1	67	7	2	339	m	9	34	43	93	16	7	23	159	1
1832010	2016-05-02	1	49	5	2	339	m	8	35	43	159	16	7	23	225	1
1833009	2015-07-01	0	41	5	2	339	m	10	38	48	160	12	4	16	224	0
1834011	2016-01-06	1	50	6	2	339	m	5	34	39	138	9	6	15	192	1
1835010	2015-09-10	0	49	5	2	339	m	5	31	36	100	13	4	17	153	1
1836013	2015-06-11	0	61	7	2	339	m	12	41	53	105	11	0	11	169	1
1837014	2016-02-17	1	65	7	2	339	m	8	28	36	122	13	7	20	178	1
1838014	2015-10-08	0	67	7	2	339	m	9	40	49	152	9	10	19	220	0
1839008	2016-02-18	1	38	4	2	339	m	4	37	41	186	14	2	16	243	1
1840010	2016-02-24	1	46	5	2	339	m	6	27	33	58	21	4	25	116	1
1841007	2016-04-06	1	34	4	2	339	m	7	39	46	209	13	5	18	273	0
1842010	2016-01-04	1	49	5	2	339	m	9	42	51	92	23	2	25	168	1
1843014	2015-12-07	0	66	7	2	339	m	9	44	53	148	18	2	20	221	0
1844011	2016-05-09	1	50	6	2	339	m	8	24	32	154	16	4	20	206	1
1845011	2016-06-09	1	52	6	2	339	m	7	31	38	100	11	0	11	149	1
1846011	2015-10-15	0	51	6	2	339	m	6	35	41	114	21	0	21	176	1
1847015	2016-03-30	1	72	8	2	339	m	4	32	36	145	14	1	15	196	1
1848013	2015-11-04	0	61	7	2	339	m	10	44	54	56	15	8	23	133	0
1849009	2015-09-24	0	43	5	2	339	m	6	34	40	184	10	5	15	239	1
1850009	2015-09-03	0	42	5	2	339	m	5	34	39	85	13	9	22	146	1
1851015	2016-05-19	1	70	8	2	339	m	17	40	57	85	7	17	24	166	1
1852013	2015-07-01	0	61	7	2	339	m	8	43	51	126	14	0	14	191	0
1853015	2015-07-09	0	74	8	2	339	m	12	38	50	126	15	9	24	200	1
1854011	2015-06-17	0	51	6	2	339	m	9	49	58	89	11	4	15	162	1
1855009	2015-07-23	0	42	5	2	339	m	7	42	49	167	9	5	14	230	1
1856015	2015-11-18	0	74	8	2	339	m	16	31	47	79	1	8	9	135	1
1857011	2016-04-25	1	50	6	2	339	m	3	26	29	107	18	0	18	154	1
1858013	2015-06-17	0	62	7	2	339	m	10	32	42	99	24	3	27	168	1
1859012	2015-10-28	0	56	6	2	339	m	9	23	32	88	16	2	18	138	1
1860010	2016-01-20	1	47	5	2	339	m	8	34	42	178	15	2	17	237	1
1861011	2016-04-28	1	50	6	2	339	m	5	29	34	72	12	9	21	127	1
1862012	2016-03-17	1	57	6	2	339	m	4	29	33	107	20	0	20	160	0
1863014	2016-01-13	1	68	7	2	339	m	8	37	45	103	13	0	13	161	1
1864017	2015-08-03	0	82	9	2	339	m	3	42	45	229	22	0	22	296	1
1865014	2016-05-18	1	68	7	2	339	m	2	27	29	86	8	5	13	128	1
1866010	2015-10-21	0	45	5	2	339	m	17	14	31	76	14	1	15	122	1
1867010	2015-12-21	1	45	5	2	339	m	8	36	44	120	9	7	16	180	1
1868009	2016-05-11	1	42	5	2	339	m	9	23	32	86	17	6	23	141	1
1869012	2016-03-23	1	59	6	2	339	m	8	29	37	97	10	3	13	147	0
1870010	2015-10-01	0	47	5	2	339	m	11	39	50	233	13	9	22	305	1
1871017	2016-01-20	1	82	9	2	339	m	8	38	46	114	12	4	16	176	0
1872012	2015-07-13	0	57	6	2	339	m	12	30	42	136	14	3	17	195	1
1873009	2016-03-17	1	40	5	2	339	m	10	40	50	89	8	9	17	156	1
1874010	2015-06-22	0	47	5	2	339	m	6	41	47	155	8	8	16	218	1
1875014	2015-08-26	0	66	7	2	339	m	5	20	25	118	10	7	17	160	0
1876017	2015-08-06	0	82	9	2	339	m	4	42	46	145	13	6	19	210	1
1877016	2015-09-17	0	79	8	2	339	m	8	45	53	99	14	3	17	169	1
1878015	2015-11-11	0	72	8	2	339	m	9	33	42	109	12	6	18	169	0
1879014	2015-07-23	0	67	7	2	339	m	8	43	51	82	13	7	20	153	0
1880010	2016-03-28	1	45	5	2	339	m	10	36	46	178	15	5	20	244	1
1881010	2016-03-24	1	46	5	2	339	m	7	38	45	122	16	0	16	183	1
1882016	2015-10-08	0	77	8	2	339	m	2	32	34	151	6	9	15	200	1
1883010	2016-03-02	1	47	5	2	339	m	3	23	26	103	12	4	16	145	1
1884010	2015-07-16	0	48	5	2	339	m	6	50	56	179	12	9	21	256	1
1885012	2015-11-02	0	59	6	2	339	m	10	27	37	110	18	3	21	168	1
1886009	2016-04-18	1	43	5	2	339	m	15	47	62	162	7	12	19	243	1
1887015	2015-11-12	0	72	8	2	339	m	9	40	49	80	20	1	21	150	0
1888011	2015-11-05	0	52	6	2	339	m	5	20	25	87	10	0	10	122	1
1889015	2016-06-02	1	72	8	2	339	m	6	32	38	100	15	4	19	157	1
1890011	2016-04-25	1	51	6	2	339	m	4	31	35	77	20	0	20	132	0
1891012	2016-04-21	1	56	6	2	339	m	6	42	48	79	16	3	19	146	0
1892008	2015-12-21	1	36	4	2	339	m	8	33	41	95	16	3	19	155	0
1893012	2015-11-05	0	55	6	2	339	m	7	28	35	144	11	6	17	196	1
1894006	2016-03-09	1	29	3	2	339	m	7	31	38	168	17	0	17	223	0
1895009	2016-03-10	1	42	5	2	339	m	5	37	42	120	7	7	14	176	1
1896015	2016-04-21	1	74	8	2	339	m	10	33	43	72	10	7	17	132	1
1897009	2015-09-28	0	43	5	2	339	m	12	37	49	177	16	11	27	253	1
1898010	2015-10-01	0	46	5	2	339	m	4	34	38	114	16	1	17	169	1
1899009	2015-10-01	0	40	5	2	339	m	4	28	32	87	13	6	19	138	1
1900012	2016-03-02	1	59	6	2	339	m	9	51	60	81	10	5	15	156	0
1901010	2015-10-22	0	45	5	2	339	m	9	32	41	127	8	11	19	187	1
1902013	2015-07-13	0	63	7	2	339	m	12	38	50	177	18	8	26	253	0
1903014	2015-08-06	0	68	7	2	339	m	8	22	30	84	15	8	23	137	1
1904014	2015-11-25	0	65	7	2	339	m	5	31	36	86	12	1	13	135	1
1905016	2015-09-02	0	79	8	2	339	m	4	33	37	97	12	0	12	146	1
1906012	2015-12-03	0	56	6	2	339	m	7	37	44	90	13	5	18	152	1
1907016	2016-06-02	1	75	8	2	339	m	4	32	36	71	16	2	18	125	1
1908015	2016-01-07	1	71	8	2	339	m	4	40	44	131	12	4	16	191	1
1909011	2015-07-15	0	51	6	2	339	m	8	29	37	91	16	3	19	147	1
1910009	2015-07-01	0	41	5	2	339	m	12	41	53	182	12	5	17	252	1
1911013	2016-04-13	1	64	7	2	339	m	4	25	29	82	12	3	15	126	1
1912012	2015-12-17	1	57	6	2	340	m	13	46	59	96	3	10	13	168	1
1915009	2015-10-15	0	42	5	2	340	m	7	37	44	86	11	6	17	147	1
1916010	2015-12-10	0	47	5	2	340	m	6	38	44	81	9	6	15	140	1
1917011	2015-04-16	0	53	6	2	340	m	3	37	40	92	9	7	16	148	1
1918015	2015-05-07	0	73	8	2	340	m	9	36	45	93	14	3	17	155	0
1919010	2016-04-18	1	49	5	2	340	m	6	20	26	50	16	6	22	98	1
1920010	2015-03-19	0	48	5	2	340	m	7	35	42	107	17	5	22	171	0
1922009	2016-05-23	1	41	5	2	340	m	4	21	25	49	17	8	25	99	1
1923012	2016-02-24	1	58	6	2	340	m	6	37	43	125	15	3	18	186	1
1924010	2016-03-07	1	47	5	2	340	m	7	40	47	117	8	6	14	178	1
1925010	2015-04-02	0	47	5	2	340	m	10	40	50	73	19	3	22	145	0
1926013	2015-08-19	0	64	7	2	340	m	6	38	44	113	6	5	11	168	0
1932016	2016-06-06	1	79	8	2	340	m	8	34	42	39	20	0	20	101	1
1934008	2015-03-02	0	37	4	2	340	m	3	31	34	178	26	7	33	245	1
1936009	2015-01-15	0	44	5	2	340	m	6	43	49	141	15	41	56	246	1
1939009	2016-04-27	1	41	5	2	340	m	3	32	35	86	14	4	18	139	1
1940013	2016-02-01	1	61	7	2	340	m	4	35	39	235	15	1	16	290	1
1942011	2016-02-01	1	50	6	2	340	m	5	22	27	148	18	1	19	194	1
1943010	2015-05-27	0	47	5	2	340	m	10	35	45	96	12	21	33	174	0
1944011	2016-03-07	1	50	6	2	340	m	6	35	41	99	18	1	19	159	1
1945010	2016-06-01	1	49	5	2	340	m	5	44	49	85	11	3	14	148	1
1946010	2016-04-06	1	48	5	2	340	m	4	36	40	94	11	3	14	148	1
1947014	2015-10-26	0	69	7	2	340	m	6	33	39	79	18	0	18	136	1
1949012	2016-05-23	1	58	6	2	340	m	5	25	30	84	10	1	11	125	1
1951014	2015-01-26	0	68	7	2	340	m	3	34	37	90	12	4	16	143	1
1952014	2015-09-30	0	65	7	2	340	m	6	31	37	95	15	6	21	153	0
1953011	2015-12-09	0	53	6	2	340	m	3	28	31	64	13	3	16	111	0
1955011	2015-06-18	0	50	6	2	340	m	6	38	44	85	3	12	15	144	1
1956010	2014-12-25	0	48	5	2	340	m	8	41	49	115	22	10	32	196	0
1959012	2015-01-15	0	58	6	2	340	m	3	47	50	79	10	0	10	139	1
1960013	2015-04-01	0	64	7	2	340	m	5	36	41	99	12	9	21	161	1
1962010	2016-03-10	1	47	5	2	340	m	6	43	49	92	15	3	18	159	1
1964008	2016-01-07	1	39	4	2	340	m	15	43	58	105	9	7	16	179	1
1965013	2016-01-14	1	61	7	2	340	m	5	39	44	82	16	4	20	146	1
1966009	2015-01-19	0	44	5	2	340	m	4	40	44	83	9	7	16	143	0
1968014	2016-03-09	1	68	7	2	340	m	6	36	42	92	15	2	17	151	1
1970015	2016-01-14	1	72	8	2	340	m	7	48	55	96	9	7	16	167	1
1971011	2016-05-30	1	52	6	2	340	m	4	31	35	52	16	4	20	107	1
1974009	2015-02-23	0	40	5	2	340	m	7	32	39	128	11	22	33	200	0
1975016	2015-03-04	0	78	8	2	340	m	0	32	32	64	12	3	15	111	1
1976007	2015-07-22	0	34	4	2	340	m	4	40	44	114	7	2	9	167	0
1978016	2015-02-26	0	77	8	2	340	m	16	82	98	108	40	13	53	259	1
1980011	2015-05-13	0	52	6	2	340	m	5	42	47	145	13	4	17	209	0
1981016	2016-04-14	1	78	8	2	340	m	6	42	48	72	8	9	17	137	1
1982012	2015-05-18	0	59	6	2	340	m	10	51	61	123	13	6	19	203	1
1983009	2015-09-17	0	42	5	2	340	m	8	38	46	79	12	1	13	138	1
1986016	2016-02-17	1	76	8	2	340	5	11	40	51	69	18	7	25	145	1
1988010	2015-03-30	0	45	5	2	340	m	0	51	51	102	11	2	13	166	1
1989011	2015-04-08	0	50	6	2	340	m	3	29	32	83	14	0	14	129	1
1990011	2015-07-23	0	53	6	2	340	m	5	40	45	82	10	4	14	141	1
1991011	2015-05-27	0	51	6	2	340	m	8	41	49	101	9	7	16	166	0
1993013	2015-06-08	0	64	7	2	340	m	7	39	46	109	13	0	13	168	1
1994011	2014-12-22	0	52	6	2	340	m	7	37	44	61	17	18	35	140	0
1995013	2015-11-30	0	60	7	2	340	m	14	39	53	117	19	0	19	189	1
1997007	2015-11-09	0	31	4	2	340	m	5	44	49	121	10	4	14	184	0
1998014	2016-02-10	1	69	7	2	340	m	8	39	47	154	9	4	13	214	1
1999012	2015-12-17	1	59	6	2	340	m	7	40	47	80	3	8	11	138	1
2001011	2015-01-22	0	52	6	2	340	m	3	43	46	68	12	12	24	138	1
2002010	2015-11-11	0	49	5	2	340	m	7	41	48	113	15	4	19	180	1
2003012	2015-08-20	0	58	6	2	340	m	11	41	52	78	15	1	16	146	1
2004007	2016-05-16	1	32	4	2	340	m	10	28	38	65	13	1	14	117	1
2005010	2015-07-22	0	46	5	2	340	m	10	32	42	114	7	2	9	165	0
2006016	2015-04-15	0	79	8	2	340	m	7	40	47	215	29	0	29	291	1
2007013	2015-06-18	0	61	7	2	340	m	13	48	61	60	13	9	22	143	0
2008015	2016-02-29	1	74	8	2	340	m	4	38	42	60	23	5	28	130	1
2009013	2016-02-08	1	64	7	2	340	m	15	28	43	82	19	8	27	152	1
2010007	2015-02-16	0	31	4	2	340	m	5	43	48	148	11	14	25	221	0
2011010	2015-09-14	0	45	5	2	340	m	4	34	38	151	12	3	15	204	0
2012014	2015-03-19	0	69	7	2	340	m	7	33	40	109	30	5	35	184	0
2013014	2015-08-10	0	67	7	2	340	m	12	37	49	110	21	0	21	180	1
2014009	2015-07-16	0	41	5	2	340	m	13	41	54	75	14	2	16	145	1
2015007	2015-04-27	0	32	4	2	340	m	10	37	47	107	9	19	28	182	0
2017015	2015-08-20	0	71	8	2	340	m	5	30	35	53	19	0	19	107	0
2019014	2016-03-16	1	66	7	2	340	m	3	24	27	61	9	6	15	103	1
2021013	2016-04-20	1	64	7	2	340	m	4	30	34	76	11	4	15	125	1
2022013	2016-01-20	1	63	7	2	340	m	6	30	36	190	11	3	14	240	1
2023018	2016-04-04	1	88	9	2	340	m	3	34	37	62	13	1	14	113	1
2024015	2015-04-01	0	74	8	2	340	m	6	32	38	74	12	2	14	126	1
2025009	2015-10-05	0	42	5	2	340	m	6	33	39	118	14	1	15	172	1
2027014	2015-09-09	0	67	7	2	340	m	21	40	61	61	12	2	14	136	1
2028014	2016-01-06	1	66	7	2	340	m	18	29	47	105	13	3	16	168	1
2029011	2015-12-14	1	51	6	2	340	m	14	36	50	117	11	6	17	184	1
2030013	2015-07-27	0	62	7	2	340	m	10	34	44	143	7	7	14	201	1
2031015	2015-11-02	0	72	8	2	340	m	13	34	47	68	15	5	20	135	1
2032010	2016-05-12	1	49	5	2	340	m	7	31	38	49	9	9	18	105	1
2033009	2015-06-22	0	43	5	2	340	m	6	37	43	131	7	6	13	187	1
2035010	2015-08-31	0	48	5	2	340	m	3	38	41	135	12	4	16	192	0
2036010	2015-06-11	0	48	5	2	340	m	4	57	61	109	20	0	20	190	0
2037009	2015-07-27	0	44	5	2	340	m	10	46	56	135	18	7	25	216	1
2041010	2015-02-09	0	47	5	2	340	m	6	38	44	130	14	4	18	192	0
2043010	2015-07-09	0	48	5	2	340	m	12	48	60	89	13	8	21	170	0
2044011	2015-11-12	0	51	6	2	340	m	6	43	49	110	16	8	24	183	0
2045014	2015-09-24	0	68	7	2	340	m	4	41	45	91	18	0	18	154	1
2046013	2015-09-28	0	63	7	2	340	m	4	32	36	84	21	1	22	142	1
2047009	2016-02-04	1	44	5	2	340	m	7	35	42	127	19	0	19	188	1
2049010	2015-03-19	0	45	5	2	340	m	9	35	44	84	18	0	18	146	0
2051014	2015-04-27	0	65	7	2	340	m	6	31	37	98	9	4	13	148	1
2052011	2015-12-17	1	53	6	2	340	m	11	46	57	84	3	17	20	161	1
2053013	2015-07-06	0	60	7	2	340	m	5	41	46	106	9	7	16	168	0
2054008	2015-06-29	0	39	4	2	340	m	5	47	52	121	9	7	16	189	0
2056017	2016-04-18	1	83	9	2	340	m	6	33	39	90	19	14	33	162	1
2057010	2016-05-25	1	45	5	2	340	m	12	45	57	73	16	2	18	148	1
2058010	2016-03-14	1	45	5	2	340	m	4	35	39	111	13	4	17	167	1
2059011	2015-09-03	0	51	6	2	340	m	8	56	64	73	30	3	33	170	1
2060013	2016-03-30	1	60	7	2	340	m	6	29	35	54	14	2	16	105	1
2061010	2015-03-16	0	48	5	2	340	m	4	32	36	79	13	7	20	135	1
2062014	2016-02-04	1	65	7	2	340	m	11	34	45	97	11	4	15	157	1
2063013	2015-05-14	0	60	7	2	340	m	10	58	68	151	10	11	21	240	1
2065011	2015-07-16	0	50	6	2	340	m	6	38	44	87	16	1	17	148	1
2067011	2016-04-13	1	50	6	2	340	m	4	46	50	106	11	3	14	170	1
2069012	2015-08-05	0	56	6	2	340	m	6	53	59	90	10	0	10	159	1
2070010	2016-04-13	1	47	5	2	340	m	6	23	29	73	9	2	11	113	1
2071013	2015-05-11	0	63	7	2	340	m	4	38	42	86	11	9	20	148	1
2073017	2015-08-26	0	80	9	2	340	m	5	34	39	120	9	3	12	171	1
2074011	2016-04-20	1	51	6	2	340	m	4	34	38	49	15	6	21	108	1
2075015	2016-05-19	1	70	8	2	340	m	9	46	55	108	9	4	13	176	1
2077015	2015-09-30	0	71	8	2	340	m	9	29	38	81	9	8	17	136	0
2078010	2015-12-24	1	48	5	2	340	m	6	38	44	101	11	2	13	158	1
2081013	2016-01-21	1	60	7	2	340	m	1	28	29	78	9	6	15	122	1
2083016	2016-01-18	1	76	8	2	340	m	4	39	43	98	19	4	23	164	1
2085009	2015-08-12	0	42	5	2	340	m	2	41	43	70	12	2	14	127	1
2086011	2015-04-20	0	50	6	2	340	m	2	60	62	217	9	6	15	294	1
2087010	2015-12-02	0	46	5	2	340	m	2	29	31	107	4	2	6	144	0
2089013	2016-02-15	1	60	7	2	340	m	12	35	47	90	26	1	27	164	1
2090015	2015-01-05	0	71	8	2	340	m	4	36	40	92	11	6	17	149	1
2091011	2015-08-19	0	51	6	2	340	m	3	37	40	121	13	1	14	175	1
2092014	2016-04-21	1	67	7	2	340	m	7	47	54	121	15	8	23	198	1
2093011	2016-01-18	1	53	6	2	340	m	5	43	48	162	14	5	19	229	1
2094013	2015-01-21	0	62	7	2	340	m	5	31	36	131	12	0	12	179	0
2095015	2015-11-18	0	70	8	2	340	m	6	29	35	71	15	0	15	121	1
2097009	2016-02-29	1	43	5	2	340	m	4	39	43	179	19	2	21	243	1
2099011	2015-06-15	0	53	6	2	340	m	6	36	42	114	14	3	17	173	0
2101013	2016-04-04	1	64	7	2	340	m	5	40	45	86	14	9	23	154	1
2102013	2016-04-21	1	62	7	2	340	m	10	25	35	69	13	3	16	120	1
2103013	2016-05-23	1	60	7	2	340	m	8	19	27	39	12	1	13	79	1
2105015	2015-10-29	0	71	8	2	340	m	15	38	53	107	8	11	19	179	1
2106011	2016-03-03	1	50	6	2	340	m	4	27	31	83	12	11	23	137	1
2107011	2015-03-05	0	52	6	2	340	m	6	46	52	79	14	7	21	152	1
2108014	2016-02-08	1	69	7	2	340	m	8	30	38	136	22	2	24	198	1
2109010	2016-04-14	1	46	5	2	340	m	11	58	69	98	14	7	21	188	1
2110012	2016-06-01	1	58	6	2	340	m	3	33	36	96	9	4	13	145	1
2111013	2015-06-10	0	60	7	2	340	m	6	31	37	101	14	7	21	159	1
2112008	2015-10-21	0	39	4	2	340	m	5	32	37	108	8	4	12	157	0
2113010	2015-04-02	0	47	5	2	340	m	4	32	36	92	12	5	17	145	0
2115010	2015-08-10	0	45	5	2	340	m	11	36	47	158	10	5	15	220	1
2118011	2016-04-11	1	51	6	2	340	m	7	31	38	48	17	6	23	109	1
2119009	2015-08-24	0	44	5	2	340	m	13	32	45	155	3	5	8	208	0
2120017	2015-12-10	0	80	9	2	340	m	12	40	52	71	5	15	20	143	1
2122013	2015-03-11	0	64	7	2	340	m	12	33	45	110	10	0	10	165	0
2123010	2015-04-23	0	47	5	2	340	m	1	48	49	192	17	4	21	262	0
2125011	2015-02-04	0	52	6	2	340	m	5	24	29	145	15	2	17	191	0
2126011	2015-08-03	0	50	6	2	340	m	6	35	41	111	11	1	12	164	0
2128013	2015-10-26	0	61	7	2	340	m	7	40	47	84	18	6	24	155	1
2130014	2015-12-03	0	67	7	2	340	m	7	43	50	102	8	8	16	168	1
2131015	2014-12-18	0	71	8	2	340	m	8	40	48	94	11	15	26	168	1
2132011	2015-04-23	0	54	6	2	340	m	3	38	41	164	30	7	37	242	0
2134013	2016-03-31	1	60	7	2	340	m	6	32	38	82	15	4	19	139	1
2135014	2015-01-26	0	69	7	2	340	m	2	41	43	98	16	0	16	157	0
2137009	2015-11-30	0	41	5	2	340	m	4	40	44	122	14	1	15	181	0
2139010	2015-06-29	0	49	5	2	340	m	10	37	47	84	14	3	17	148	1
2141015	2016-04-25	1	71	8	2	340	m	5	28	33	80	13	2	15	128	1
2142008	2015-10-05	0	37	4	2	340	m	7	35	42	102	11	1	12	156	0
2144011	2015-06-24	0	52	6	2	340	m	2	38	40	178	10	7	17	235	1
2145012	2015-04-20	0	56	6	2	340	m	3	39	42	120	13	3	16	178	0
2146014	2015-02-04	0	67	7	2	340	m	5	32	37	124	8	3	11	172	1
2147016	2016-04-28	1	76	8	2	340	m	4	24	28	64	12	12	24	116	1
2149010	2015-08-13	0	46	5	2	340	m	12	28	40	103	9	4	13	156	0
2150014	2015-01-05	0	68	7	2	340	m	4	31	35	79	10	25	35	149	0
2152010	2015-08-17	0	49	5	2	340	m	11	44	55	241	12	10	22	318	0
2153016	2015-07-30	0	76	8	2	340	m	7	37	44	114	8	6	14	172	0
2154009	2015-05-18	0	43	5	2	340	m	6	49	55	79	25	2	27	161	0
2157009	2015-01-14	0	44	5	2	340	m	9	37	46	202	13	0	13	261	0
2158013	2015-03-23	0	62	7	2	340	m	5	36	41	65	17	0	17	123	1
2159016	2015-03-09	0	75	8	2	340	m	3	38	41	72	15	4	19	132	1
2160014	2016-02-22	1	67	7	2	340	m	3	47	50	162	19	2	21	233	1
2161010	2015-03-11	0	46	5	2	340	m	7	39	46	84	12	2	14	144	0
2162016	2016-06-06	1	76	8	2	340	m	5	35	40	72	24	2	26	138	1
2163011	2016-01-07	1	52	6	2	340	m	4	37	41	66	8	9	17	124	1
2164010	2016-02-15	1	46	5	2	340	m	9	44	53	113	15	4	19	185	1
2165014	2016-01-21	1	67	7	2	340	m	2	31	33	77	10	4	14	124	1
2166012	2015-05-11	0	55	6	2	340	m	10	44	54	172	16	8	24	250	1
2167015	2016-04-28	1	71	8	2	340	m	5	20	25	87	13	11	24	136	1
2168009	2015-09-09	0	42	5	2	340	m	8	35	43	107	11	3	14	164	0
2169009	2015-04-15	0	41	5	2	340	m	6	26	32	93	17	7	24	149	0
2170011	2016-01-27	1	50	6	2	340	m	6	31	37	82	6	7	13	132	1
2171014	2015-03-12	0	69	7	2	340	m	8	39	47	109	14	2	16	172	1
2172012	2015-04-02	0	55	6	2	340	m	7	42	49	86	31	0	31	166	1
2173012	2015-07-06	0	56	6	2	340	m	6	35	41	73	13	0	13	127	0
2176013	2015-09-16	0	63	7	2	340	m	6	32	38	90	15	0	15	143	1
2177012	2015-10-14	0	56	6	2	340	m	4	33	37	182	34	1	35	254	1
2178011	2015-11-16	0	52	6	2	340	m	7	41	48	82	18	3	21	151	0
2179015	2015-07-08	0	73	8	2	340	m	5	39	44	126	16	0	16	186	1
2180014	2015-12-02	0	68	7	2	340	m	5	30	35	123	2	2	4	162	0
2181011	2016-01-25	1	50	6	2	340	m	11	35	46	183	21	3	24	253	1
2183009	2015-09-07	0	43	5	2	340	m	7	39	46	95	13	8	21	162	1
2184015	2016-02-08	1	71	8	2	340	m	10	32	42	112	17	8	25	179	1
2186009	2015-01-07	0	42	5	2	340	m	1	44	45	194	12	4	16	255	1
2187016	2015-04-08	0	79	8	2	340	m	7	46	53	96	13	0	13	162	0
2188009	2015-02-02	0	44	5	2	340	m	7	32	39	141	14	35	49	229	0
2189014	2015-05-13	0	69	7	2	340	m	8	44	52	74	13	6	19	145	1
2190014	2014-12-22	0	68	7	2	340	m	8	35	43	91	21	3	24	158	0
2191009	2015-06-08	0	42	5	2	340	m	10	48	58	120	20	3	23	201	0
2194012	2016-04-27	1	57	6	2	340	m	8	28	36	63	16	2	18	117	1
2196013	2015-08-27	0	63	7	2	340	m	5	43	48	94	14	0	14	156	1
2197010	2015-09-09	0	48	5	2	340	m	7	25	32	75	15	3	18	125	0
2199014	2016-05-16	1	68	7	2	340	m	2	29	31	46	10	7	17	94	1
2200010	2014-12-17	0	48	5	2	340	m	1	36	37	112	9	0	9	158	0
2202013	2015-01-29	0	60	7	2	340	m	7	34	41	81	19	8	27	149	0
2204013	2016-06-08	1	63	7	2	340	m	0	24	24	61	8	4	12	97	1
2205014	2015-02-23	0	65	7	2	340	m	10	30	40	180	16	19	35	255	1
2208009	2014-12-24	0	41	5	2	340	m	5	33	38	187	10	1	11	236	0
2209011	2016-03-10	1	50	6	2	340	m	5	55	60	101	9	7	16	177	1
2210008	2015-12-09	0	35	4	2	340	m	11	39	50	51	30	4	34	135	1
2215009	2015-11-12	0	41	5	2	340	m	7	44	51	99	2	9	11	161	0
2218012	2015-11-09	0	57	6	2	340	m	5	40	45	98	17	5	22	165	1
2224015	2015-07-27	0	72	8	2	340	m	8	43	51	91	3	2	5	147	1
2227011	2015-01-07	0	53	6	2	340	m	10	34	44	92	11	4	15	151	1
2229009	2015-10-26	0	41	5	2	341	m	15	29	44	162	16	5	21	227	0
2230014	2015-10-07	0	66	7	2	341	m	5	29	34	110	12	2	14	158	1
2231019	2015-04-09	0	91	10	2	341	m	6	50	56	109	18	8	26	191	0
2232007	2015-09-03	0	34	4	2	341	m	4	42	46	110	6	16	22	178	0
2233010	2015-10-08	0	48	5	2	341	m	5	33	38	157	4	2	6	201	1
2234017	2015-06-29	0	82	9	2	341	m	7	35	42	162	6	13	19	223	1
2235016	2015-10-19	0	75	8	2	341	m	0	34	34	111	17	1	18	163	1
2236013	2016-05-25	1	60	7	2	341	m	7	38	45	115	32	2	34	194	1
2238012	2016-06-01	1	57	6	2	341	m	11	30	41	127	25	2	27	195	1
2239009	2015-01-05	0	42	5	2	341	m	11	33	44	149	12	4	16	209	0
2240014	2016-05-30	1	68	7	2	341	m	5	35	40	75	19	6	25	140	1
2241017	2016-06-08	1	83	9	2	341	m	8	39	47	137	15	1	16	200	1
2242016	2015-07-09	0	77	8	2	341	m	3	37	40	188	9	8	17	245	0
2244012	2016-04-06	1	56	6	2	341	m	6	34	40	106	15	0	15	161	1
2245010	2016-03-09	1	47	5	2	341	m	5	34	39	136	14	0	14	189	1
2246012	2015-12-16	1	59	6	2	341	m	9	27	36	77	8	10	18	131	1
2247010	2015-08-26	0	48	5	2	341	m	2	27	29	101	18	1	19	149	0
2248011	2016-01-04	1	52	6	2	341	m	11	48	59	217	15	6	21	297	1
2249010	2016-05-11	1	49	5	2	341	m	11	25	36	126	37	4	41	203	1
2250011	2015-06-04	0	51	6	2	341	m	10	37	47	172	11	7	18	237	1
2251013	2016-01-13	1	63	7	2	341	m	3	37	40	144	21	2	23	207	0
2253011	2016-06-09	1	54	6	2	341	m	3	31	34	96	25	1	26	156	0
2254010	2015-11-25	0	47	5	2	341	m	4	33	37	134	10	1	11	182	1
2255011	2015-01-21	0	50	6	2	341	m	3	38	41	199	8	4	12	252	1
2256011	2015-04-16	0	50	6	2	341	m	0	33	33	142	29	1	30	205	1
2257015	2016-03-23	1	73	8	2	341	m	12	39	51	106	10	11	21	178	1
2259014	2015-11-04	0	67	7	2	341	m	9	32	41	152	18	5	23	216	1
2261011	2015-07-13	0	51	6	2	341	m	9	30	39	116	10	2	12	167	1
2263009	2015-07-06	0	44	5	2	341	m	0	41	41	152	11	1	12	205	0
2266017	2015-11-09	0	81	9	2	342	m	6	38	44	43	20	0	20	107	0
2267012	2016-01-14	1	57	6	2	342	m	13	41	54	113	9	6	15	182	0
2268009	2015-09-28	0	42	5	2	342	m	1	37	38	92	16	0	16	146	0
2269010	2015-07-15	0	46	5	2	342	m	9	44	53	53	11	3	14	120	1
2271013	2016-05-02	1	64	7	2	342	m	4	22	26	53	17	0	17	96	0
2272010	2016-03-24	1	49	5	2	342	m	3	35	38	67	11	3	14	119	1
2273010	2015-08-24	0	49	5	2	342	m	8	40	48	191	11	6	17	256	0
2274019	2016-04-28	1	92	10	2	342	m	12	30	42	39	21	4	25	106	0
2275008	2015-11-19	0	39	4	2	342	m	5	32	37	60	13	6	19	116	0
2276013	2016-01-27	1	61	7	2	343	5	4	54	58	350	21	0	21	429	0
2277014	2015-06-29	0	66	7	1	344	b	6	44	50	124	15	3	18	192	0
2278002	2015-07-27	0	7	1	2	344	b	1	36	37	168	25	0	25	230	1
2279008	2015-02-18	0	37	4	1	344	b	2	28	30	151	8	3	11	192	0
2281008	2015-01-21	0	39	4	2	344	b	9	33	42	267	0	20	20	329	0
2282003	2015-03-30	0	11	2	1	344	b	1	24	25	88	9	2	11	124	0
2283018	2015-12-14	1	86	9	1	344	b	14	40	54	165	42	0	42	261	0
2284011	2016-02-08	1	54	6	2	344	b	8	31	39	160	12	0	12	211	1
2285015	2016-01-25	1	71	8	2	344	b	2	32	34	154	14	8	22	210	1
2286014	2015-05-25	0	68	7	2	344	b	5	44	49	148	7	11	18	215	1
2287015	2015-09-07	0	73	8	2	344	b	3	39	42	192	18	6	24	258	0
2288014	2015-01-05	0	69	7	2	344	b	3	27	30	134	11	4	15	179	0
2290009	2015-07-15	0	44	5	2	344	b	8	22	30	81	10	0	10	121	0
2291009	2015-02-02	0	42	5	1	344	b	4	37	41	182	22	5	27	250	1
2294006	2015-06-08	0	27	3	1	344	b	9	28	37	180	13	6	19	236	0
2295015	2015-05-18	0	72	8	2	344	b	7	37	44	118	24	2	26	188	0
2296004	2015-01-30	0	18	2	1	344	b	6	27	33	158	22	5	27	218	0
2297014	2015-11-02	0	66	7	2	344	b	6	25	31	155	13	0	13	199	0
2298014	2015-08-31	0	67	7	2	344	b	12	30	42	161	14	0	14	217	1
2299010	2015-05-27	0	47	5	1	344	b	5	27	32	144	18	2	20	196	0
2301010	2014-12-15	0	49	5	1	344	b	5	30	35	314	12	5	17	366	1
2302010	2015-06-10	0	48	5	2	344	b	5	43	48	123	17	1	18	189	1
2303010	2015-12-28	1	46	5	1	344	b	5	23	28	160	13	1	14	202	1
2304015	2015-01-14	0	73	8	2	344	b	4	29	33	86	11	1	12	131	0
2305014	2015-03-09	0	67	7	2	344	b	16	30	46	195	12	8	20	261	0
2306014	2015-03-25	0	67	7	2	344	b	0	34	34	170	9	0	9	213	1
2307010	2015-03-18	0	46	5	2	344	b	3	37	40	61	17	3	20	121	0
2308007	2015-09-28	0	32	4	1	344	b	10	33	43	178	11	0	11	232	1
2311006	2015-01-26	0	26	3	2	344	b	6	30	36	341	11	9	20	397	0
2312015	2015-01-05	0	71	8	1	344	b	14	37	51	140	20	4	24	215	1
2313014	2015-11-16	0	65	7	2	344	b	5	27	32	118	22	2	24	174	1
2316009	2014-12-22	0	40	5	2	344	b	5	25	30	189	9	3	12	231	0
2319013	2015-09-14	0	60	7	1	344	b	3	40	43	197	16	4	20	260	0
2321014	2016-01-18	1	66	7	2	344	b	8	38	46	201	8	7	15	262	1
2322007	2015-10-05	0	33	4	1	344	b	3	36	39	209	9	14	23	271	1
2323003	2015-08-26	0	14	2	1	344	b	3	58	61	203	13	6	19	283	0
2324013	2014-12-15	0	63	7	1	344	b	5	34	39	195	11	2	13	247	1
2325015	2015-10-05	0	74	8	2	344	b	4	30	34	152	13	2	15	201	0
2326014	2016-06-06	1	67	7	2	344	b	3	37	40	186	14	3	17	243	1
2329016	2016-03-28	1	79	8	1	344	b	9	40	49	195	13	1	14	258	1
2334012	2016-03-14	1	58	6	2	344	b	5	43	48	112	10	6	16	176	1
2335013	2015-02-02	0	64	7	1	344	b	4	35	39	169	11	3	14	222	0
2337008	2015-01-19	0	39	4	1	344	b	14	23	37	166	9	6	15	218	0
2339005	2015-09-14	0	22	3	2	344	b	12	36	48	155	14	6	20	223	0
2340013	2014-12-17	0	63	7	1	344	b	4	21	25	115	13	11	24	164	0
2341015	2015-06-15	0	70	8	2	344	b	7	30	37	163	14	0	14	214	0
2343014	2015-12-07	0	66	7	1	344	b	30	28	58	282	12	10	22	362	0
2344005	2015-10-26	0	22	3	1	344	b	5	30	35	100	17	0	17	152	0
2345016	2015-06-01	0	75	8	2	344	b	4	24	28	155	10	2	12	195	1
2346008	2015-09-28	0	38	4	1	344	b	8	33	41	139	10	7	17	197	0
2348006	2015-07-13	0	26	3	1	344	b	13	32	45	169	14	6	20	234	0
2349009	2015-07-06	0	40	5	1	344	b	11	23	34	224	14	9	23	281	1
2350009	2016-05-30	1	40	5	1	344	b	3	29	32	152	33	3	36	220	1
2351015	2016-02-29	1	72	8	1	344	b	5	29	34	275	19	2	21	330	1
2352012	2015-02-09	0	59	6	1	344	b	3	32	35	191	18	3	21	247	1
2354012	2015-03-30	0	59	6	2	344	b	2	27	29	125	7	6	13	167	1
2356018	2015-04-15	0	86	9	2	344	b	11	23	34	188	26	6	32	254	0
2357003	2015-08-24	0	13	2	2	344	b	4	38	42	78	14	1	15	135	0
2358007	2015-01-19	0	33	4	2	344	b	3	30	33	180	17	4	21	234	0
2361009	2016-05-02	1	40	5	1	344	b	4	32	36	154	17	5	22	212	1
2362016	2016-04-18	1	75	8	2	344	b	3	27	30	166	17	10	27	223	1
2363015	2015-07-22	0	73	8	1	344	b	4	28	32	209	18	2	20	261	1
2364008	2015-07-31	0	37	4	1	344	b	10	29	39	109	13	4	17	165	1
2365015	2015-04-13	0	70	8	2	344	b	4	27	31	210	10	0	10	251	0
2367011	2016-04-11	1	54	6	2	344	b	15	37	52	121	13	5	18	191	1
2372014	2015-11-04	0	65	7	2	344	b	10	30	40	172	20	1	21	233	0
2373015	2016-04-04	1	74	8	1	344	b	3	26	29	161	25	1	26	216	1
2374001	2016-02-01	1	4	1	2	344	b	7	18	25	136	14	5	19	180	1
2375002	2016-01-25	1	6	1	1	344	b	3	34	37	163	20	6	26	226	1
2376010	2015-06-19	0	47	5	2	344	b	2	28	30	121	7	2	9	160	0
2377009	2015-08-03	0	41	5	1	344	b	6	29	35	158	10	5	15	208	0
2378015	2015-03-09	0	70	8	1	344	b	7	41	48	215	13	1	14	277	0
2379014	2015-08-24	0	68	7	2	344	b	6	34	40	140	16	1	17	197	0
2380008	2015-01-28	0	36	4	2	344	b	6	35	41	284	10	6	16	341	0
2381011	2016-04-04	1	54	6	1	344	b	9	35	44	206	22	1	23	273	1
2384015	2016-04-25	1	70	8	2	344	b	9	63	72	139	10	3	13	224	1
2385002	2015-06-15	0	6	1	1	344	b	6	38	44	266	20	2	22	332	1
2386001	2015-06-18	0	1	1	1	344	b	4	34	38	104	18	10	28	170	0
2387015	2016-04-11	1	72	8	2	344	b	5	34	39	210	11	4	15	264	1
2388002	2014-12-24	0	9	1	1	344	b	5	28	33	153	21	3	24	210	0
2389008	2015-09-16	0	38	4	1	344	b	7	28	35	214	16	3	19	268	0
2390013	2016-03-09	1	60	7	1	344	b	9	30	39	138	13	3	16	193	1
2391001	2015-02-16	0	3	1	2	344	b	7	47	54	231	4	20	24	309	0
2392009	2016-03-07	1	43	5	1	344	b	8	29	37	152	14	4	18	207	1
2394016	2015-06-24	0	79	8	2	344	b	7	28	35	171	17	3	20	226	1
2395008	2015-02-04	0	38	4	2	344	b	5	31	36	227	13	8	21	284	0
2397010	2016-04-18	1	49	5	2	344	b	4	37	41	237	13	5	18	296	1
2398011	2016-01-18	1	53	6	1	344	b	7	27	34	237	12	1	13	284	1
2399014	2015-03-23	0	66	7	1	344	b	4	41	45	191	21	0	21	257	0
2400016	2015-04-27	0	77	8	2	344	b	8	29	37	106	22	5	27	170	0
2401014	2015-05-08	0	66	7	1	344	b	12	33	45	144	17	6	23	212	0
2402006	2015-07-17	0	27	3	1	344	b	6	33	39	292	13	3	16	347	1
2405009	2015-11-09	0	43	5	2	344	b	6	19	25	139	19	0	19	183	0
2406010	2016-03-30	1	45	5	2	344	b	5	29	34	60	21	0	21	115	1
2407012	2015-11-18	0	56	6	2	344	b	4	24	28	165	10	5	15	208	1
2408012	2015-08-05	0	57	6	1	344	b	8	34	42	113	17	0	17	172	1
2409015	2015-04-20	0	71	8	2	344	b	7	39	46	171	13	5	18	235	1
2411009	2015-07-06	0	40	5	1	344	b	2	33	35	161	14	4	18	214	1
2412012	2016-03-07	1	58	6	2	344	b	7	32	39	169	23	4	27	235	0
2413014	2015-02-16	0	69	7	1	344	b	8	25	33	250	7	11	18	301	0
2414014	2015-04-06	0	68	7	2	344	b	3	24	27	56	17	1	18	101	1
2415014	2015-09-07	0	69	7	1	344	b	6	30	36	160	18	3	21	217	0
2416014	2016-02-03	1	67	7	2	344	b	11	31	42	225	14	6	20	287	1
2418011	2015-06-03	0	52	6	2	344	b	4	20	24	80	8	9	17	121	1
2420015	2015-10-14	0	70	8	2	344	b	3	27	30	120	12	5	17	167	1
2421011	2016-02-01	1	51	6	1	344	b	5	32	37	194	15	3	18	249	1
2423017	2015-11-30	0	80	9	2	344	b	9	32	41	170	9	6	15	226	0
2424015	2016-05-11	1	73	8	2	344	b	4	28	32	139	11	7	18	189	1
2425010	2016-02-15	1	45	5	2	344	b	7	31	38	232	13	2	15	285	1
2426009	2015-04-20	0	40	5	1	344	b	3	31	34	161	18	2	20	215	1
2428013	2015-10-30	0	62	7	1	344	b	7	34	41	111	11	4	15	167	0
2429013	2015-02-23	0	62	7	2	344	b	1	33	34	161	14	5	19	214	0
2430002	2015-04-08	0	5	1	2	344	b	5	26	31	75	25	0	25	131	0
2436007	2016-03-16	1	31	4	1	344	b	1	24	25	124	17	3	20	169	1
2437014	2015-07-13	0	67	7	1	344	b	6	27	33	168	18	1	19	220	0
2438014	2015-10-26	0	66	7	1	344	b	13	19	32	167	12	15	27	226	0
2439005	2016-02-15	1	21	3	1	344	b	6	19	25	147	22	1	23	195	1
2440007	2016-03-23	1	33	4	2	344	b	6	27	33	161	13	1	14	208	1
2441014	2015-11-11	0	67	7	1	344	b	6	33	39	202	13	0	13	254	0
2444002	2015-07-27	0	9	1	2	344	b	3	32	35	107	28	2	30	172	0
2445013	2016-02-22	1	64	7	2	344	b	6	34	40	173	8	2	10	223	1
2448014	2015-11-02	0	69	7	2	344	b	3	22	25	136	18	1	19	180	1
2449002	2015-08-28	0	5	1	1	344	b	7	25	32	141	15	0	15	188	0
2450016	2015-03-02	0	77	8	2	344	b	6	30	36	207	13	6	19	262	1
2453010	2015-03-18	0	46	5	2	344	b	2	33	35	61	12	3	15	111	1
2454014	2015-05-13	0	68	7	2	344	b	4	27	31	135	8	5	13	179	1
2455006	2016-02-22	1	25	3	1	344	b	10	20	30	217	9	3	12	259	1
2456005	2015-11-09	0	24	3	1	344	b	9	25	34	240	20	1	21	295	0
2459010	2015-06-08	0	48	5	2	344	b	13	26	39	137	13	7	20	196	1
2460008	2015-04-27	0	39	4	2	344	b	4	29	33	179	13	1	14	226	0
2463008	2015-07-01	0	36	4	2	344	b	8	29	37	182	16	7	23	242	1
2464014	2016-05-09	1	68	7	2	344	b	6	30	36	126	18	6	24	186	1
2465011	2016-02-29	1	51	6	1	344	b	6	23	29	272	14	0	14	315	0
2466013	2015-08-24	0	62	7	2	344	b	12	26	38	139	9	0	9	186	0
2468001	2015-05-18	0	2	1	2	344	b	9	28	37	65	24	0	24	126	0
2470016	2015-05-20	0	78	8	1	344	b	6	27	33	62	10	10	20	115	1
2471015	2015-06-22	0	72	8	2	344	b	9	24	33	90	13	7	20	143	0
2472012	2015-10-19	0	57	6	1	344	b	4	37	41	152	24	0	24	217	1
2473014	2016-04-13	1	68	7	2	344	b	3	32	35	204	23	1	24	263	1
2474006	2015-10-07	0	27	3	2	344	b	1	30	31	141	9	6	15	187	0
2475015	2015-06-17	0	72	8	2	344	b	11	32	43	139	13	6	19	201	1
2476013	2015-12-21	1	64	7	2	344	b	5	34	39	164	24	2	26	229	1
2477011	2016-05-23	1	51	6	2	344	b	6	31	37	135	11	6	17	189	0
2478016	2015-12-14	1	78	8	2	344	b	13	28	41	204	15	12	27	272	1
2479017	2015-07-08	0	80	9	2	344	b	10	30	40	134	9	10	19	193	0
2480015	2015-10-19	0	71	8	2	344	b	11	39	50	125	16	5	21	196	0
2481009	2016-05-23	1	43	5	1	344	b	3	34	37	132	13	4	17	186	1
2483008	2016-01-04	1	39	4	1	344	b	7	33	40	191	22	0	22	253	1
2484005	2015-02-09	0	23	3	1	344	b	4	34	38	96	13	5	18	152	1
2485016	2015-10-30	0	75	8	1	344	b	4	28	32	110	21	3	24	166	0
2487008	2016-05-30	1	37	4	1	344	b	11	33	44	204	18	3	21	269	1
2488015	2015-09-02	0	70	8	1	344	b	1	25	26	132	16	3	19	177	0
2489010	2015-04-20	0	45	5	2	344	b	6	24	30	142	11	2	13	185	0
2491014	2015-06-29	0	67	7	1	344	b	4	30	34	126	15	6	21	181	0
2493005	2015-09-30	0	24	3	1	344	b	5	33	38	181	15	2	17	236	0
2494012	2015-01-08	0	57	6	2	345	m	5	40	45	110	6	4	10	165	0
2496015	2015-04-24	0	70	8	1	346	7	20	25	45	37	25	5	30	112	0
2500010	2015-02-09	0	48	5	2	347	m	3	29	32	71	35	0	35	138	0
2501011	2016-04-15	1	51	6	2	347	m	15	31	46	64	18	7	25	135	0
2502009	2016-03-14	1	40	5	2	347	m	8	30	38	124	5	9	14	176	1
2503007	2015-10-07	0	34	4	2	347	m	5	27	32	50	10	0	10	92	1
2504010	2015-08-12	0	45	5	2	347	m	7	23	30	76	14	0	14	120	0
2505006	2016-01-13	1	27	3	1	347	5	6	34	40	77	24	0	24	141	0
2507008	2014-12-15	0	38	4	2	347	m	7	33	40	148	12	4	16	204	0
2508010	2015-08-24	0	45	5	2	347	m	4	35	39	84	15	5	20	143	1
2509007	2015-10-22	0	33	4	2	347	m	7	34	41	100	9	11	20	161	0
2510007	2015-12-14	1	30	4	2	347	m	4	29	33	104	11	3	14	151	1
2511006	2015-12-24	1	25	3	2	347	m	4	25	29	67	9	2	11	107	1
2513008	2015-07-29	0	38	4	2	347	m	3	24	27	34	36	0	36	97	1
2516010	2015-04-13	0	49	5	2	347	m	9	24	33	44	15	24	39	116	0
2517010	2015-04-23	0	46	5	2	347	m	13	34	47	99	11	5	16	162	1
2518009	2016-01-13	1	41	5	2	347	m	10	32	42	186	11	4	15	243	1
2519013	2015-08-12	0	63	7	2	347	m	8	26	34	30	12	4	16	80	0
2521007	2015-12-16	1	33	4	2	347	m	10	22	32	95	12	1	13	140	1
2523009	2016-03-28	1	43	5	2	347	m	5	29	34	78	10	8	18	130	1
2524010	2016-03-14	1	49	5	2	347	m	6	31	37	108	18	0	18	163	1
2525009	2015-08-27	0	43	5	2	347	m	11	34	45	54	15	2	17	116	0
2528004	2015-03-30	0	19	2	2	347	m	5	30	35	53	33	0	33	121	0
2530005	2015-06-11	0	23	3	2	347	m	6	36	42	40	22	0	22	104	1
2531009	2015-03-16	0	42	5	2	347	m	3	31	34	48	23	6	29	111	1
2532005	2016-01-27	1	20	3	2	347	m	10	32	42	148	9	2	11	201	0
2533010	2015-09-02	0	45	5	2	347	m	3	31	34	167	13	9	22	223	1
2534006	2016-05-11	1	28	3	1	347	5	3	34	37	117	7	7	14	168	0
2535012	2016-05-02	1	56	6	2	348	m	6	17	23	55	18	4	22	100	0
2536009	2015-09-16	0	41	5	2	348	m	6	40	46	164	7	5	12	222	0
2538007	2015-06-01	0	32	4	2	348	m	5	28	33	83	7	13	20	136	0
2539010	2015-09-14	0	47	5	2	348	m	4	32	36	65	14	3	17	118	0
2540010	2015-08-27	0	45	5	2	348	m	9	38	47	46	18	2	20	113	0
2542010	2014-12-17	0	47	5	2	350	5	16	61	77	80	17	4	21	178	0
2544011	2015-02-18	0	54	6	2	351	5	7	39	46	209	14	9	23	278	0
2549009	2015-06-30	0	40	5	2	356	9	13	12	25	14	1	7	8	47	0
2551013	2015-01-26	0	63	7	2	357	b	1	37	38	168	14	2	16	222	0
2553016	2015-08-21	0	79	8	1	357	b	8	34	42	151	23	2	25	218	0
2555014	2015-05-11	0	65	7	2	357	b	6	38	44	178	18	3	21	243	0
2556016	2016-02-08	1	77	8	2	357	b	13	37	50	210	25	0	25	285	0
2558008	2016-04-26	1	35	4	2	358	9	9	13	22	33	14	4	18	73	0
2560016	2015-09-10	0	78	8	1	359	i	14	31	45	231	16	1	17	293	0
2562002	2016-03-30	1	5	1	2	359	i	5	55	60	147	13	9	22	229	1
2563006	2016-04-28	1	29	3	2	359	i	10	36	46	119	13	4	17	182	0
2564001	2016-03-30	1	0	1	2	359	i	7	81	88	192	10	6	16	296	1
2565001	2015-07-29	0	0	1	2	359	i	2	57	59	181	8	1	9	249	1
2567015	2015-02-27	0	74	8	2	359	i	4	49	53	550	20	1	21	624	0
2569001	2015-04-15	0	4	1	2	359	i	3	65	68	162	19	1	20	250	0
2570001	2016-06-08	1	1	1	2	359	i	4	75	79	304	20	2	22	405	1
2572001	2016-05-11	1	1	1	1	359	i	6	74	80	306	16	17	33	419	1
2574001	2015-09-16	0	0	1	2	359	i	11	30	41	176	9	2	11	228	1
2576001	2015-05-20	0	0	1	1	359	i	3	37	40	236	26	0	26	302	0
2577001	2015-07-10	0	0	1	2	359	i	14	43	57	145	10	2	12	214	1
2578001	2015-07-01	0	1	1	2	359	i	3	54	57	268	17	10	27	352	0
2581001	2015-10-28	0	0	1	1	359	i	4	72	76	221	15	2	17	314	0
2582001	2015-09-16	0	2	1	1	359	i	3	83	86	243	17	4	21	350	1
2583001	2015-12-02	0	3	1	1	359	i	5	96	101	441	18	8	26	568	0
2585001	2015-11-18	0	2	1	1	359	i	1	74	75	493	30	0	30	598	0
2586001	2015-07-13	0	3	1	1	359	i	5	54	59	116	7	1	8	183	1
2587001	2015-12-16	1	1	1	1	359	i	9	56	65	292	15	1	16	373	1
2588014	2014-12-22	0	67	7	1	359	i	9	42	51	552	13	12	25	628	0
2589002	2015-08-26	0	6	1	2	359	i	5	66	71	235	25	4	29	335	1
2590001	2016-06-01	1	0	1	2	359	i	9	48	57	203	17	18	35	295	1
2591016	2015-04-30	0	79	8	1	359	i	8	36	44	318	12	0	12	374	0
2592014	2015-12-03	0	65	7	1	359	i	7	38	45	251	16	3	19	315	0
2595004	2015-08-10	0	15	2	2	362	e	15	43	58	134	25	0	25	217	0
2596001	2015-05-10	0	0	1	2	363	e	0	37	37	133	16	0	16	186	0
2597001	2016-05-13	1	0	1	1	363	e	12	36	48	86	9	6	15	149	0
2598001	2015-07-20	0	0	1	1	364	e	6	40	46	164	24	1	25	235	0
2599003	2016-05-30	1	10	2	2	365	e	5	48	53	180	15	7	22	255	0
2600001	2015-06-06	0	0	1	1	365	e	10	46	56	146	24	18	42	244	0
2601013	2015-03-31	0	63	7	2	365	h	3	38	41	68	20	3	23	132	0
2602001	2014-12-25	0	0	1	1	365	e	6	26	32	98	33	5	38	168	0
2605001	2015-11-17	0	0	1	1	365	e	7	41	48	128	22	0	22	198	0
2609001	2016-04-28	1	0	1	2	365	e	2	46	48	115	18	10	28	191	0
2610001	2014-12-18	0	0	1	1	365	e	3	51	54	129	22	0	22	205	0
2611001	2016-05-13	1	0	1	1	366	e	7	62	69	85	36	5	41	195	0
2612017	2015-03-05	0	82	9	2	367	h	16	39	55	62	20	3	23	140	0
2614016	2016-03-08	1	77	8	2	369	l	18	41	59	289	22	13	35	383	1
2615016	2015-08-13	0	77	8	1	369	l	12	76	88	466	19	13	32	586	0
2618013	2016-02-04	1	60	7	2	369	l	29	31	60	38	12	2	14	112	1
2619016	2015-12-07	0	77	8	1	369	l	28	27	55	77	21	5	26	158	0
2620011	2015-04-23	0	54	6	2	369	l	13	26	39	65	14	7	21	125	0
2621008	2015-11-19	0	39	4	2	369	l	25	31	56	101	27	11	38	195	0
2622013	2015-06-11	0	63	7	2	369	l	15	69	84	84	31	0	31	199	1
2624011	2015-04-20	0	50	6	2	369	l	31	20	51	211	19	3	22	284	0
2625014	2015-08-27	0	66	7	1	369	l	5	39	44	123	6	5	11	178	0
2626007	2015-12-22	1	34	4	1	369	l	13	33	46	100	2	5	7	153	0
2629014	2016-03-10	1	67	7	1	369	l	13	25	38	65	14	4	18	121	1
2630015	2015-09-08	0	71	8	2	369	l	26	36	62	154	34	3	37	253	1
2631015	2015-08-13	0	74	8	2	369	l	37	30	67	155	28	2	30	252	0
2632012	2015-08-31	0	55	6	1	369	l	21	25	46	232	23	2	25	303	1
2633011	2016-05-31	1	51	6	1	369	l	27	41	68	176	15	8	23	267	1
2634014	2015-03-05	0	65	7	1	369	l	27	132	159	82	40	2	42	283	0
2635014	2015-07-14	0	67	7	1	369	l	0	71	71	87	17	1	18	176	1
2636017	2016-04-22	1	82	9	1	369	h	5	32	37	142	14	2	16	195	0
2637020	2015-07-16	0	97	10	2	369	l	6	54	60	100	35	2	37	197	1
2638019	2015-12-24	1	90	10	2	369	l	48	33	81	19	29	6	35	135	1
2639015	2015-01-06	0	72	8	2	369	l	13	43	56	135	7	11	18	209	0
2640016	2016-02-09	1	78	8	2	369	l	17	37	54	96	16	4	20	170	1
2642015	2015-04-03	0	71	8	2	369	p	32	31	63	158	22	14	36	257	1
2645011	2015-11-21	0	54	6	1	370	l	5	49	54	37	10	4	14	105	1
2646015	2015-09-29	0	73	8	1	370	l	6	38	44	35	16	0	16	95	0
2648013	2015-01-13	0	60	7	1	370	l	14	62	76	357	18	16	34	467	0
2649017	2015-09-29	0	81	9	1	370	l	5	35	40	122	17	4	21	183	0
2651012	2015-12-21	1	57	6	1	370	l	23	20	43	63	15	2	17	123	1
2654013	2015-03-31	0	62	7	1	370	l	14	29	43	20	19	0	19	82	1
2656010	2016-03-27	1	47	5	2	370	l	7	45	52	153	63	10	73	278	0
2657014	2016-02-02	1	67	7	1	370	l	4	30	34	47	12	7	19	100	1
2667001	2015-10-28	0	0	1	2	371	e	28	66	94	114	26	8	34	242	0
2668001	2015-12-02	0	0	1	1	372	e	5	75	80	152	38	2	40	272	1
2669001	2015-01-28	0	1	1	1	372	e	8	51	59	174	41	11	52	285	1
2670001	2015-07-01	0	0	1	1	372	e	4	60	64	139	33	11	44	247	1
2671001	2015-09-28	0	0	1	1	372	e	13	50	63	174	12	5	17	254	0
2673001	2015-10-14	0	0	1	2	372	e	6	95	101	241	31	11	42	384	0
2674001	2015-12-21	1	1	1	1	372	e	3	53	56	175	18	13	31	262	1
2675001	2016-02-17	1	3	1	1	372	e	11	69	80	210	19	43	62	352	1
2677001	2015-06-10	0	0	1	1	372	e	0	47	47	146	17	6	23	216	0
2678005	2015-04-13	0	23	3	2	372	e	4	40	44	269	40	3	43	356	0
2679001	2015-04-08	0	0	1	1	372	e	7	66	73	125	32	3	35	233	0
2680001	2015-04-08	0	0	1	2	372	e	3	98	101	296	22	4	26	423	0
2681001	2016-04-11	1	0	1	1	372	e	13	31	44	168	23	1	24	236	1
2682014	2016-05-17	1	66	7	2	373	2	20	31	51	407	56	7	63	521	1
2684015	2015-12-10	0	71	8	1	373	l	31	41	72	90	10	10	20	182	0
2685015	2016-01-05	1	72	8	1	373	l	6	31	37	86	8	7	15	138	1
2687012	2015-06-04	0	56	6	1	373	l	18	27	45	80	15	4	19	144	0
2688010	2015-06-23	0	48	5	1	373	l	3	30	33	126	11	1	12	171	1
2689014	2015-09-08	0	65	7	1	373	l	14	28	42	76	13	1	14	132	0
2691010	2016-03-03	1	48	5	1	373	l	4	21	25	70	13	8	21	116	1
2692015	2015-05-26	0	73	8	1	373	l	19	20	39	110	26	4	30	179	0
2693010	2015-04-09	0	46	5	1	373	l	15	28	43	92	13	12	25	160	1
2696012	2015-10-13	0	56	6	1	373	l	25	29	54	132	17	4	21	207	1
2698006	2016-04-21	1	29	3	2	373	l	1	34	35	109	18	0	18	162	0
2699008	2015-10-15	0	39	4	1	373	l	16	33	49	81	15	4	19	149	0
2701014	2015-08-06	0	65	7	1	373	l	15	29	44	58	17	6	23	125	0
2703011	2015-11-19	0	53	6	2	373	l	33	40	73	75	18	7	25	173	0
2704010	2016-03-10	1	46	5	1	373	l	34	20	54	66	12	2	14	134	1
2705015	2016-03-24	1	70	8	2	373	l	1	26	27	83	11	8	19	129	0
2707010	2016-01-14	1	46	5	1	373	l	8	29	37	107	21	8	29	173	0
2711011	2015-06-16	0	54	6	1	373	l	15	16	31	112	20	2	22	165	0
2712013	2014-12-18	0	60	7	1	373	l	20	31	51	131	10	6	16	198	0
2714016	2015-10-27	0	75	8	1	373	l	24	33	57	121	20	6	26	204	1
2715001	2015-06-17	0	1	1	1	373	e	8	71	79	118	56	0	56	253	0
2716016	2016-01-19	1	78	8	2	373	l	13	30	43	70	24	0	24	137	0
2717014	2015-07-02	0	66	7	1	373	l	4	44	48	89	16	4	20	157	0
2718014	2015-02-03	0	65	7	2	373	l	20	32	52	71	6	32	38	161	1
2721011	2016-05-12	1	54	6	1	373	l	16	30	46	115	24	1	25	186	1
2722015	2015-02-17	0	71	8	1	373	l	14	32	46	117	16	5	21	184	0
2723001	2015-07-15	0	1	1	1	374	e	6	39	45	125	37	1	38	208	1
2724001	2016-01-04	1	1	1	2	374	e	6	42	48	146	14	5	19	213	1
2725001	2015-05-08	0	0	1	2	374	e	3	38	41	140	12	2	14	195	1
2726001	2016-02-17	1	0	1	1	374	e	3	84	87	107	58	2	60	254	1
2727001	2015-08-26	0	2	1	2	375	e	3	28	31	117	20	1	21	169	0
2728001	2015-09-16	0	0	1	2	375	e	0	49	49	112	14	0	14	175	0
2729016	2016-01-18	1	78	8	2	376	k	8	25	33	207	19	4	23	263	0
2730010	2015-10-16	0	47	5	1	377	k	13	49	62	260	32	0	32	354	0
2731015	2016-02-04	1	73	8	1	378	k	15	33	48	101	14	3	17	166	0
2732016	2016-05-18	1	76	8	2	378	k	17	39	56	111	12	7	19	186	1
2733015	2015-01-07	0	70	8	2	378	k	17	29	46	111	4	13	17	174	1
2734016	2015-02-04	0	76	8	2	378	k	19	27	46	107	12	3	15	168	0
2735017	2016-02-17	1	81	9	2	378	k	5	34	39	98	16	4	20	157	0
2736011	2016-02-03	1	53	6	2	379	k	10	86	96	229	16	4	20	345	0
2740015	2014-12-15	0	72	8	2	380	k	9	25	34	89	12	17	29	152	0
2741007	2015-03-09	0	33	4	1	380	k	5	32	37	90	15	6	21	148	0
2742010	2015-12-04	0	47	5	1	380	k	17	82	99	466	14	11	25	590	0
2744014	2015-12-07	0	69	7	2	380	k	15	61	76	285	4	21	25	386	0
2745006	2015-09-28	0	29	3	2	380	k	15	38	53	156	23	5	28	237	0
2746016	2015-03-27	0	75	8	2	380	k	23	42	65	299	27	5	32	396	1
2747009	2016-05-23	1	43	5	2	380	k	26	49	75	123	22	3	25	223	0
2749012	2016-05-09	1	55	6	2	380	k	19	34	53	84	21	3	24	161	0
2750016	2016-02-01	1	78	8	2	380	k	24	55	79	273	22	6	28	380	1
2752013	2015-09-14	0	64	7	2	380	k	7	39	46	230	23	4	27	303	1
2753014	2015-04-06	0	65	7	2	380	k	17	40	57	276	17	9	26	359	1
2755014	2016-04-11	1	68	7	2	380	k	16	45	61	279	19	4	23	363	1
2756014	2016-01-29	1	67	7	2	380	k	22	85	107	245	61	5	66	418	1
2759013	2016-02-23	1	61	7	2	381	k	21	28	49	135	11	4	15	199	0
2761015	2015-11-18	0	72	8	2	381	k	36	23	59	145	24	5	29	233	1
2763016	2016-04-06	1	76	8	2	381	k	20	29	49	197	10	6	16	262	1
2765014	2015-06-08	0	67	7	2	382	k	7	50	57	261	11	0	11	329	0
2766016	2015-11-16	0	76	8	2	382	k	8	53	61	268	18	2	20	349	0
2767014	2015-06-09	0	65	7	2	383	k	5	34	39	135	18	4	22	196	0
2768010	2016-01-15	1	48	5	2	384	k	5	29	34	98	18	2	20	152	0
2769012	2015-09-16	0	57	6	2	385	k	6	60	66	148	23	2	25	239	0
2771010	2015-11-30	0	48	5	1	386	k	8	36	44	109	18	6	24	177	0
2774013	2015-05-18	0	61	7	2	386	k	28	32	60	115	23	3	26	201	0
2775016	2015-11-16	0	79	8	2	386	k	10	39	49	114	24	2	26	189	0
2776015	2015-03-06	0	72	8	2	386	k	1	39	40	104	17	3	20	164	0
2777011	2015-05-08	0	54	6	2	386	k	7	37	44	138	27	58	85	267	0
2778017	2015-08-24	0	82	9	2	386	k	3	33	36	92	33	0	33	161	1
2779017	2016-02-01	1	80	9	2	386	k	19	52	71	83	20	0	20	174	1
2780014	2015-06-22	0	65	7	2	386	k	7	32	39	72	19	1	20	131	0
2781013	2015-08-17	0	61	7	1	386	k	6	29	35	88	14	3	17	140	1
2782016	2015-03-31	0	75	8	2	386	k	10	54	64	281	31	13	44	389	1
2783013	2015-06-29	0	61	7	2	386	k	7	41	48	89	13	7	20	157	1
2784016	2015-10-19	0	76	8	2	386	k	8	39	47	119	17	4	21	187	0
2785011	2016-04-18	1	50	6	2	386	k	8	39	47	159	25	6	31	237	1
2786013	2016-02-08	1	60	7	2	386	k	10	39	49	98	16	8	24	171	1
2790016	2015-03-30	0	76	8	2	386	k	4	37	41	92	13	11	24	157	1
2791018	2016-02-15	1	85	9	2	386	k	5	38	43	83	16	8	24	150	1
2792016	2015-11-30	0	76	8	2	386	k	2	44	46	114	16	3	19	179	0
2794012	2015-03-23	0	57	6	2	386	k	5	63	68	115	13	5	18	201	0
2795016	2016-05-23	1	77	8	2	386	k	6	47	53	96	33	30	63	212	1
2796020	2014-12-16	0	95	10	2	386	k	2	29	31	145	24	4	28	204	0
2797011	2015-01-26	0	54	6	2	386	k	11	33	44	97	24	1	25	166	0
2799015	2016-03-07	1	73	8	2	386	k	5	33	38	121	17	4	21	180	1
2800012	2014-12-22	0	56	6	2	386	k	23	30	53	141	14	4	18	212	0
2801010	2016-02-05	1	47	5	2	386	k	5	41	46	106	16	5	21	173	1
2807011	2015-01-19	0	54	6	2	386	k	13	44	57	139	23	1	24	220	0
2808015	2015-05-11	0	70	8	2	386	k	21	43	64	121	28	4	32	217	1
2811015	2015-06-15	0	73	8	2	386	k	5	42	47	116	10	1	11	174	0
2813013	2016-04-01	1	63	7	2	386	k	3	36	39	81	16	6	22	142	1
2814018	2014-12-15	0	85	9	2	386	k	10	33	43	128	18	3	21	192	1
2815011	2016-03-25	1	53	6	2	386	k	2	36	38	79	20	0	20	137	1
2816012	2016-04-11	1	58	6	2	386	k	7	29	36	98	25	10	35	169	1
2817012	2015-01-19	0	58	6	2	386	k	2	40	42	87	48	0	48	177	0
2818014	2016-04-25	1	67	7	2	386	k	6	43	49	111	17	0	17	177	1
2819012	2015-07-31	0	56	6	2	386	k	12	32	44	135	10	2	12	191	0
2820015	2016-03-28	1	70	8	2	386	k	16	27	43	109	0	15	15	167	1
2821011	2016-02-22	1	52	6	2	386	k	5	35	40	202	19	1	20	262	1
2822014	2015-04-13	0	69	7	2	386	k	16	26	42	86	18	3	21	149	0
2823017	2016-02-19	1	83	9	2	386	k	9	35	44	97	18	5	23	164	1
2824012	2016-01-25	1	58	6	1	386	k	4	52	56	152	17	5	22	230	1
2825013	2016-02-29	1	60	7	1	386	k	5	42	47	223	11	10	21	291	1
2826018	2016-05-24	1	86	9	2	386	k	6	37	43	94	19	9	28	165	1
2827016	2015-04-06	0	75	8	2	386	k	14	27	41	102	12	5	17	160	1
2828017	2015-11-13	0	84	9	1	386	k	7	41	48	108	25	0	25	181	1
2829013	2015-09-04	0	62	7	2	386	k	4	34	38	84	15	4	19	141	1
2830013	2015-11-27	0	61	7	2	386	k	8	62	70	91	21	15	36	197	0
2832011	2015-04-17	0	51	6	1	386	k	6	31	37	133	18	0	18	188	0
2833017	2015-12-30	1	82	9	2	386	k	2	32	34	96	29	0	29	159	1
2835015	2016-06-10	1	73	8	1	386	k	4	46	50	114	29	1	30	194	1
2836014	2016-03-11	1	68	7	2	386	k	4	41	45	102	29	5	34	181	1
2837016	2015-05-11	0	75	8	2	386	k	8	37	45	112	22	2	24	181	0
2838014	2015-03-16	0	67	7	2	386	k	10	29	39	95	19	3	22	156	0
2840015	2015-01-19	0	72	8	2	386	k	12	40	52	137	21	25	46	235	1
2841012	2015-03-23	0	59	6	1	386	k	6	60	66	175	16	5	21	262	0
2843014	2015-06-22	0	67	7	1	386	k	3	37	40	109	21	6	27	176	1
2847017	2015-05-11	0	81	9	2	386	k	17	20	37	98	23	3	26	161	1
2849015	2016-01-04	1	70	8	1	386	k	8	49	57	127	19	2	21	205	1
2850013	2016-03-25	1	64	7	1	386	k	3	42	45	153	7	14	21	219	1
2851018	2016-03-22	1	89	9	1	386	k	9	41	50	100	27	5	32	182	1
2852015	2015-05-25	0	70	8	1	386	k	3	33	36	133	18	28	46	215	0
2854015	2016-01-04	1	72	8	2	386	k	8	42	50	142	18	7	25	217	1
2855010	2015-04-03	0	47	5	1	386	k	8	42	50	83	28	10	38	171	0
2858018	2015-08-03	0	87	9	2	386	k	3	60	63	91	14	10	24	178	1
2859011	2015-02-23	0	52	6	2	386	k	1	32	33	81	16	2	18	132	1
2862013	2015-07-13	0	64	7	2	386	k	2	38	40	118	17	4	21	179	1
2863014	2015-06-08	0	68	7	2	386	k	8	40	48	90	27	5	32	170	0
2864014	2015-09-14	0	68	7	2	386	k	4	37	41	120	25	3	28	189	0
2865011	2016-01-25	1	54	6	1	386	k	8	40	48	125	27	1	28	201	1
2868013	2015-06-05	0	64	7	2	386	k	6	39	45	111	24	1	25	181	1
2869013	2016-04-25	1	63	7	2	386	k	15	33	48	115	15	2	17	180	1
2871016	2015-01-26	0	77	8	2	386	k	7	30	37	121	18	4	22	180	0
2872014	2015-02-06	0	69	7	2	386	k	1	38	39	98	28	0	28	165	0
2873015	2016-02-29	1	74	8	2	386	k	7	34	41	147	13	6	19	207	1
2874012	2016-05-16	1	59	6	2	386	k	13	40	53	170	25	5	30	253	1
2876010	2014-12-22	0	47	5	2	386	k	8	39	47	92	18	1	19	158	0
2878015	2015-06-01	0	73	8	2	386	k	8	41	49	118	15	7	22	189	1
2879017	2015-06-29	0	83	9	2	386	k	9	38	47	140	10	11	21	208	1
2880012	2016-02-12	1	55	6	1	386	k	6	46	52	143	9	7	16	211	1
2881013	2016-04-04	1	61	7	1	386	k	5	41	46	106	22	8	30	182	1
2882012	2015-04-20	0	59	6	2	386	k	4	60	64	83	12	15	27	174	0
2883017	2016-03-24	1	83	9	1	386	k	8	40	48	92	22	4	26	166	0
2884016	2016-02-05	1	79	8	2	386	k	8	47	55	109	18	4	22	186	1
2885015	2015-11-02	0	71	8	2	386	k	11	30	41	116	26	6	32	189	1
2886017	2015-11-19	0	84	9	2	386	k	3	37	40	91	26	0	26	157	1
2887011	2015-04-27	0	51	6	2	386	k	2	58	60	116	19	5	24	200	1
2888013	2015-02-09	0	64	7	2	386	k	8	36	44	86	25	11	36	166	0
2889017	2015-03-20	0	82	9	2	386	k	13	37	50	123	20	6	26	199	1
2891015	2015-09-07	0	70	8	2	386	k	1	44	45	200	19	13	32	277	0
2892017	2016-05-02	1	81	9	2	386	k	8	28	36	70	2	17	19	125	1
2893015	2015-07-13	0	72	8	1	386	k	3	44	47	110	20	4	24	181	1
2895015	2015-04-20	0	74	8	2	386	k	5	34	39	114	19	13	32	185	0
2896016	2016-04-08	1	77	8	2	386	k	9	36	45	115	22	2	24	184	1
2897014	2015-06-29	0	69	7	2	386	k	9	36	45	77	11	7	18	140	0
2899012	2015-08-10	0	58	6	1	386	k	10	35	45	113	19	5	24	182	1
2900016	2015-04-27	0	79	8	2	386	k	8	55	63	128	26	19	45	236	0
2901012	2015-08-03	0	59	6	2	386	k	6	29	35	110	17	5	22	167	1
2902014	2015-04-10	0	68	7	2	386	k	5	44	49	78	14	7	21	148	0
2906014	2016-04-25	1	67	7	2	386	k	9	42	51	176	20	2	22	249	1
2907014	2015-01-30	0	67	7	2	386	k	2	39	41	132	21	0	21	194	1
2908011	2015-01-23	0	54	6	2	386	k	1	36	37	120	18	13	31	188	1
2909010	2015-05-01	0	47	5	2	386	k	3	40	43	108	18	6	24	175	1
2913012	2015-11-06	0	57	6	2	386	k	21	44	65	146	25	3	28	239	0
2914010	2015-10-09	0	48	5	1	386	k	5	35	40	150	17	3	20	210	0
2915013	2016-02-01	1	63	7	2	386	k	9	33	42	112	19	8	27	181	1
2916013	2015-07-17	0	63	7	2	386	k	8	41	49	99	3	13	16	164	1
2917017	2016-02-23	1	84	9	2	386	k	6	37	43	101	15	9	24	168	1
2918016	2016-03-28	1	77	8	2	386	k	9	35	44	92	14	8	22	158	1
2919015	2015-12-07	0	72	8	2	386	k	5	27	32	142	19	0	19	193	0
2920011	2015-02-23	0	50	6	1	386	k	5	41	46	82	22	0	22	150	1
2921015	2015-05-25	0	73	8	2	386	k	5	39	44	69	19	5	24	137	1
2922012	2015-11-09	0	59	6	2	386	k	5	40	45	75	20	6	26	146	0
2925010	2015-06-22	0	47	5	2	386	k	4	41	45	119	11	8	19	183	0
2926011	2015-08-07	0	52	6	1	386	k	5	41	46	259	10	14	24	329	0
2928015	2015-04-13	0	71	8	1	386	k	3	44	47	102	12	8	20	169	0
2929014	2015-04-17	0	66	7	1	386	k	4	40	44	121	21	6	27	192	1
2931014	2015-05-01	0	67	7	1	386	k	8	36	44	115	24	7	31	190	1
2932015	2015-04-17	0	74	8	1	386	k	1	53	54	112	17	10	27	193	1
2933016	2015-07-13	0	76	8	2	386	k	4	35	39	108	21	2	23	170	0
2934014	2016-06-06	1	65	7	1	386	k	9	42	51	128	17	6	23	202	1
2935013	2016-03-07	1	63	7	1	386	k	4	35	39	120	18	3	21	180	1
2936013	2016-03-07	1	61	7	2	386	k	5	36	41	128	15	3	18	187	1
2937006	2015-03-30	0	28	3	1	386	k	3	54	57	119	17	7	24	200	0
2938011	2015-10-26	0	51	6	2	386	k	6	41	47	124	22	2	24	195	1
2940018	2015-10-19	0	87	9	2	386	k	8	42	50	136	30	3	33	219	1
2942017	2016-02-22	1	80	9	2	386	k	7	0	7	255	23	6	29	291	1
2943011	2016-05-09	1	54	6	2	386	k	5	42	47	100	13	6	19	166	1
2947016	2016-04-18	1	75	8	2	386	k	12	42	54	121	22	4	26	201	1
2949013	2015-09-11	0	61	7	2	386	k	6	44	50	103	26	4	30	183	0
2951013	2015-05-25	0	60	7	2	386	k	3	38	41	72	19	2	21	134	1
2955012	2015-05-18	0	59	6	2	386	k	7	34	41	75	15	5	20	136	0
2956014	2015-07-06	0	67	7	2	386	k	5	41	46	103	16	9	25	174	1
2957013	2016-04-22	1	62	7	2	386	k	4	41	45	129	16	5	21	195	1
2959012	2015-10-19	0	56	6	2	386	k	9	34	43	77	15	4	19	139	1
2961015	2016-03-04	1	70	8	2	386	k	0	46	46	164	24	0	24	234	1
2964018	2015-01-05	0	86	9	2	386	k	3	52	55	140	21	6	27	222	1
2966013	2015-07-27	0	60	7	2	386	k	12	35	47	125	16	3	19	191	1
2967006	2015-08-10	0	29	3	2	386	k	9	34	43	105	39	11	50	198	0
2970015	2015-02-16	0	73	8	2	386	k	18	36	54	86	23	18	41	181	0
2971009	2015-12-04	0	42	5	2	386	k	5	41	46	137	4	12	16	199	0
2972017	2016-01-29	1	81	9	2	386	k	6	50	56	109	44	3	47	212	1
2978012	2015-02-02	0	59	6	2	386	k	3	33	36	114	26	5	31	181	0
2979015	2016-05-23	1	74	8	2	386	k	2	41	43	95	26	8	34	172	1
2980014	2015-02-02	0	67	7	1	386	k	6	30	36	118	25	3	28	182	1
2981016	2015-10-26	0	77	8	2	386	k	11	48	59	100	27	6	33	192	1
2982011	2015-09-07	0	51	6	1	386	k	5	36	41	162	8	5	13	216	1
2983014	2016-01-18	1	66	7	1	386	k	6	31	37	168	14	4	18	223	1
2984017	2015-07-24	0	83	9	2	386	k	0	41	41	140	23	4	27	208	1
2985014	2015-12-03	0	65	7	2	386	k	19	22	41	143	20	1	21	205	1
2987016	2016-05-16	1	79	8	2	386	k	9	40	49	81	35	4	39	169	1
2989015	2016-02-15	1	71	8	2	386	k	5	33	38	121	14	5	19	178	1
2992015	2015-07-24	0	73	8	2	386	k	5	38	43	108	25	4	29	180	1
2994017	2016-05-30	1	81	9	2	386	k	5	75	80	87	23	8	31	198	1
2995016	2016-02-08	1	75	8	2	386	k	13	33	46	138	5	17	22	206	1
2996014	2015-08-28	0	66	7	2	386	k	4	39	43	74	20	5	25	142	0
2997016	2015-10-23	0	78	8	2	386	k	22	40	62	212	28	1	29	303	0
2998014	2015-12-11	0	65	7	2	386	k	6	38	44	137	15	3	18	199	1
3000012	2015-08-17	0	57	6	2	386	k	3	30	33	100	9	10	19	152	0
3002014	2015-07-10	0	65	7	2	386	k	8	45	53	130	24	3	27	210	0
3005014	2015-09-28	0	66	7	1	386	k	3	45	48	103	26	6	32	183	1
3006017	2015-12-21	1	81	9	2	386	k	10	28	38	105	23	0	23	166	1
3009006	2015-08-10	0	28	3	2	386	k	7	35	42	91	12	10	22	155	0
3012015	2015-03-02	0	72	8	2	386	k	1	46	47	106	17	1	18	171	0
3015012	2015-09-18	0	59	6	2	386	k	6	43	49	77	31	1	32	158	1
3017013	2016-06-03	1	61	7	2	386	k	12	43	55	77	25	7	32	164	1
3018015	2015-02-23	0	72	8	2	386	k	3	40	43	99	19	0	19	161	0
3019013	2016-04-04	1	61	7	2	386	k	3	35	38	149	19	3	22	209	1
3020014	2015-05-25	0	68	7	2	386	k	4	42	46	111	21	7	28	185	1
3021014	2014-12-12	0	69	7	2	386	k	2	31	33	184	17	4	21	238	1
3022017	2016-03-14	1	82	9	2	386	k	5	48	53	85	23	3	26	164	1
3026014	2015-06-01	0	65	7	2	386	k	2	42	44	98	23	0	23	165	1
3027012	2015-11-09	0	59	6	2	386	k	6	39	45	255	13	7	20	320	1
3028015	2015-10-02	0	74	8	2	386	k	5	51	56	92	22	1	23	171	0
3032014	2016-03-29	1	67	7	2	386	k	4	35	39	67	19	3	22	128	1
3033014	2015-12-14	1	68	7	2	386	k	9	45	54	147	22	2	24	225	1
3034007	2015-03-09	0	33	4	2	386	k	7	48	55	86	16	7	23	164	0
3035017	2016-04-15	1	82	9	2	386	k	10	35	45	77	37	6	43	165	0
3036017	2016-03-11	1	81	9	2	386	k	18	38	56	99	18	7	25	180	0
3038011	2016-01-08	1	53	6	2	386	k	10	34	44	132	20	0	20	196	1
3043016	2015-10-05	0	78	8	2	386	k	4	34	38	142	18	3	21	201	1
3045014	2015-12-21	1	66	7	2	386	k	7	36	43	122	18	5	23	188	1
3047013	2016-05-09	1	63	7	1	386	k	4	46	50	89	20	4	24	163	1
3048016	2015-02-09	0	78	8	2	386	k	10	29	39	140	23	0	23	202	1
3049015	2015-03-16	0	72	8	2	386	k	4	37	41	104	25	6	31	176	1
3050017	2015-01-09	0	81	9	2	386	k	0	57	57	104	26	2	28	189	1
3053016	2015-02-13	0	78	8	2	386	k	1	39	40	134	22	4	26	200	0
3055014	2016-02-08	1	67	7	2	386	k	0	26	26	158	13	7	20	204	1
3056014	2015-09-07	0	66	7	2	386	k	8	33	41	135	18	1	19	195	0
3057012	2015-11-13	0	58	6	2	386	k	15	40	55	109	11	9	20	184	0
3058012	2015-03-23	0	58	6	2	386	k	8	27	35	68	15	7	22	125	0
3059013	2015-02-09	0	62	7	1	386	k	3	27	30	115	17	15	32	177	1
3060016	2015-09-18	0	78	8	2	386	k	9	37	46	179	18	0	18	243	0
3061015	2015-04-03	0	71	8	2	386	k	2	35	37	136	28	1	29	202	0
3062017	2016-05-23	1	81	9	1	386	k	7	50	57	91	34	0	34	182	0
3063011	2015-12-14	1	51	6	2	386	k	6	39	45	159	8	5	13	217	1
3064014	2016-02-15	1	67	7	2	386	k	4	45	49	135	15	5	20	204	1
[truncated: 11,289 more rows]
