# Supplementary material
Source: publisher figshare collection journal article supplement (https://plos.figshare.com/articles/dataset/_/7118924)
Supplement: Supplementary file 1 [file 1 › pone.0204301.s003.pdf]

**S1 Table. Steps for pre-anesthesia time and anesthesia induction time.**

| Steps for pre-anesthesia time (Sign in)        |                                                                              |
|------------------------------------------------|------------------------------------------------------------------------------|
| 1                                              | Identify the patient himself his / her name (full name) and birth of date    |
| 2                                              | Surgical site and the operative side to the patient                          |
| 3                                              | Marking of surgical site                                                     |
| 4                                              | Allergies                                                                    |
| 5                                              | Moving teeth, false teeth, a tooth under treatment                           |
| 6                                              | Restricted limbs, range of joint motion                                      |
| 7                                              | A biological monitor is worn by the patient and is operating normally        |
| 8                                              | Significant changes in vital signs before surgery                            |
| Steps for anesthesia induction time (Time out) |                                                                              |
| 1                                              | All team members introduce their names and roles by themselves               |
| Confirmation by physician                      |                                                                              |
| 2                                              | Patient name, date of birth                                                  |
| 3                                              | Surgical method and surgical procedure                                       |
| 4                                              | Confirmation of skin incision location and site                              |
| 5                                              | Important points of surgery                                                  |
| 6                                              | Scheduled operation time                                                     |
| 7                                              | Expected bleeding volume                                                     |
| 8                                              | Confirm installation of neutral zone                                         |
| Confirmation by anesthesiologist               |                                                                              |
| 9                                              | Implementation of antimicrobial prophylaxis within 60 minutes before surgery |
| 10                                             | Blood transfusion preparation                                                |
| 11                                             | Patient's specific problems                                                  |
| Confirmation by nursing team                   |                                                                              |
| 12                                             | Sterilization of equipment and materials used for surgery                    |
| 13                                             | Problems to be shared within the team with allergies, equipment etc.         |
| 14                                             | Display necessary images                                                     |
| 15                                             | Operation of intermittent pneumatic device                                   |
