# Supplementary material
Source: publisher figshare collection journal article supplement (https://plos.figshare.com/articles/dataset/_/7118924)
Supplement: Supplementary file 1 [file 1 › pone.0204301.s004.pdf]

**S2 Table. The distribution of the department before matching.**

| Department                                 | Before JCI | After JCI | p value |
|--------------------------------------------|------------|-----------|---------|
| Breast oncology                            | 393        | 206       | 0.075   |
| Cardiovascular surgery                     | 659        | 312       |         |
| Coloproctological surgery                  | 383        | 177       |         |
| Esophageal and Gastroenterological surgery | 320        | 150       |         |
| Gynecology                                 | 1,113      | 533       |         |
| Hepatobiliary-Pancreatic surgery           | 320        | 174       |         |
| Neurosurgery                               | 489        | 301       |         |
| Obstetrics                                 | 341        | 200       |         |
| Ophthalmology                              | 306        | 174       |         |
| Orthopedics                                | 848        | 453       |         |
| Otolaryngology                             | 706        | 332       |         |
| Pediatric surgery                          | 1,205      | 606       |         |
| Plastic surgery                            | 474        | 221       |         |
| Thoracic surgery                           | 533        | 239       |         |
| Urology                                    | 646        | 331       |         |
| Others                                     | 99         | 44        |         |
| Total                                      | 8,835      | 4,453     |         |

JCI; Joint Commission International, p value is calculated by chi-square test.
