# Supplementary material
Source: publisher figshare collection journal article supplement (https://plos.figshare.com/articles/dataset/_/7118924)
Supplement: Supplementary file 1 [file 1 › pone.0204301.s005.pdf]

**S3 Table. Time periods in the operating room before matching.**

| Time periods, minutes (SD)   | Before JCI<br>n = 8,835 | After JCI<br>n = 4,453 | p value |
|------------------------------|-------------------------|------------------------|---------|
| Pre-anesthesia time          | 8.3 (7.0)               | 8.5 (6.9)              | 0.056   |
| Anesthesia induction time    | 35.6 (16.7)             | 34.8 (16.4)            | *0.010  |
| Pre-procedure/surgery time   | 43.9 (18.5)             | 43.3 (18.3)            | 0.108   |
| Procedure/surgery time       | 139.8 (124.7)           | 136.3 (124.8)          | 0.126   |
| Anesthesia awareness time    | 16.7 (10.6)             | 16.9 (10.4)            | 0.420   |
| Post-anesthesia time         | 4.5 (5.6)               | 4.5 (4.7)              | 0.914   |
| Post-procedure/surgery time  | 21.2 (11.5)             | 21.4 (11.0)            | 0.424   |
| Total procedure/surgery time | 204.9 (141.6)           | 201.0 (142.1)          | 0.136   |

JCI; Joint Commission International, SD; standard deviation. p values are calculated using the unpaired t-test (\*p<0.05).
