# Supplementary material
Source: publisher figshare collection journal article supplement (https://plos.figshare.com/articles/dataset/_/7118924)
Supplement: Supplementary file 1 [file 1 › pone.0204301.s006.pdf]

1 **S1 Fig. The trend of incidents, which is when continuous treatment is required**  
2 **following surgery due to an incident.**

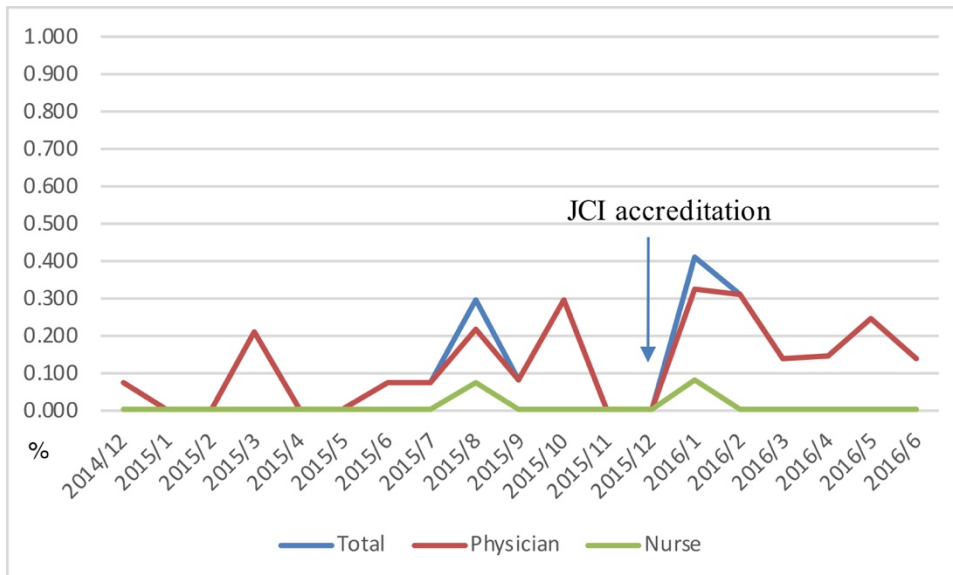

3  
4 JCI; Joint Commission International.  
5
